# Supplementary material for: NHC macrometallocycles of mercury(ii) and silver(i): synthesis, structural studies and recognition of Hg(ii) complex 4 for silver ion
Source: Royal Society of Chemistry journal article supplement (doi:10.1039/c4ra14340j), 2015-01-01

## Supplementary Information

### NHC Macrometallocycles of Mercury(II) and Silver(I): Synthesis, Structural Studies and Recognition of Hg(II) Complex 4 for Silver ion

Qing-Xiang Liu,\* Qing Wei, Rui Liu, Xiao-Jun Zhao and Zhi-Xiang Zhao

#### Table of contents

1. CCDC numbers for complexes **1-8**.
2. Summary of crystallographic data for **1-8** (Table S1-Table S3).
3. The dihedral angles of complexes **2-8** (Table S4).
4. The distances of  $\pi$ - $\pi$  interactions, distances (Å) and angles of C-H $\cdots$  $\pi$  contacts and H-Bonding geometry of complexes **1-8** (Table S5, Table S6).
5. The crystal packings of complexes **1-8** (Fig. S1-Fig. S8).
6. The UV/Vis and fluorescence studies of complex **4** (Fig. S9-Fig. S12).
7. The infrared spectra of complex **4** and **4**·AgNO<sub>3</sub> (Fig. S13).
8. The <sup>1</sup>H NMR and <sup>13</sup>C NMR spectra of precursors and complexes **1-8** (Fig. S14-Fig. S47).

## 1. CCDC numbers for complexes 1-8.

CCDC1033244-1033251 contains the supplementary crystallographic data for complexes **1-8**. These data can be obtained free of charge via <http://www.ccdc.cam.ac.uk/conts/retrieving.html>, or from the Cambridge Crystallographic Data Centre, 12 Union Road, Cambridge, CB2 1EZ, UK; fax: (+44) 1223-336-033; or e-mail: [deposit@ccdc.cam.ac.uk](mailto:deposit@ccdc.cam.ac.uk).

## 2. Summary of crystallographic data for 1-8 (Table S1-Table S3).

**Table S1** Summary of crystallographic data for **1-3**

|                                                                  | <b>1</b>                                                                                      | <b>2</b>                                                                                                           | <b>3·0.5(C<sub>4</sub>H<sub>10</sub>O)</b>                                                                                                             |
|------------------------------------------------------------------|-----------------------------------------------------------------------------------------------|--------------------------------------------------------------------------------------------------------------------|--------------------------------------------------------------------------------------------------------------------------------------------------------|
| chemical formula                                                 | C <sub>32</sub> H <sub>34</sub> Cl <sub>6</sub> N <sub>4</sub> O <sub>2</sub> Pd <sub>2</sub> | C <sub>160</sub> H <sub>136</sub> Cl <sub>2</sub> Hg <sub>4</sub> I <sub>6</sub> N <sub>24</sub><br>O <sub>8</sub> | C <sub>34</sub> H <sub>36</sub> Cl <sub>2</sub> Hg <sub>2</sub> I <sub>2</sub> N <sub>4</sub> O <sub>2</sub><br>·0.5(C <sub>4</sub> H <sub>10</sub> O) |
| fw                                                               | 932.13                                                                                        | 4157.59                                                                                                            | 1295.61                                                                                                                                                |
| Cryst syst                                                       | Orthorhombic                                                                                  | Monoclinic                                                                                                         | Monoclinic                                                                                                                                             |
| space group                                                      | <i>Pbca</i>                                                                                   | <i>P2/c</i>                                                                                                        | <i>C2/c</i>                                                                                                                                            |
| <i>a</i> /Å                                                      | 11.013(4)                                                                                     | 11.563(2)                                                                                                          | 13.177(1)                                                                                                                                              |
| <i>b</i> /Å                                                      | 21.581(8)                                                                                     | 15.735(3)                                                                                                          | 17.859(2)                                                                                                                                              |
| <i>c</i> /Å                                                      | 28.993(1)                                                                                     | 23.079(4)                                                                                                          | 18.350(2)                                                                                                                                              |
| <i>α</i> /deg                                                    | 90                                                                                            | 90                                                                                                                 | 90                                                                                                                                                     |
| <i>β</i> /deg                                                    | 90                                                                                            | 116.4(7)                                                                                                           | 95.4(2)                                                                                                                                                |
| <i>γ</i> /deg                                                    | 90                                                                                            | 90                                                                                                                 | 90                                                                                                                                                     |
| <i>V</i> /Å <sup>3</sup>                                         | 6891.0(4)                                                                                     | 3760.3(1)                                                                                                          | 4298.9(9)                                                                                                                                              |
| <i>Z</i>                                                         | 8                                                                                             | 1                                                                                                                  | 4                                                                                                                                                      |
| <i>D</i> <sub>calcd</sub> , Mg/m <sup>3</sup>                    | 1.797                                                                                         | 1.836                                                                                                              | 2.002                                                                                                                                                  |
| Abs coeff, mm <sup>-1</sup>                                      | 1.546                                                                                         | 5.404                                                                                                              | 8.729                                                                                                                                                  |
| <i>F</i> (000)                                                   | 3712                                                                                          | 2000                                                                                                               | 2420                                                                                                                                                   |
| Cryst size, mm                                                   | 0.18 × 0.17 × 0.16                                                                            | 0.28 × 0.24 × 0.23                                                                                                 | 0.18 × 0.17 × 0.16                                                                                                                                     |
| <i>θ</i> <sub>min</sub> , <i>θ</i> <sub>max</sub> , deg          | 2.19, 25.01                                                                                   | 1.29, 25.01                                                                                                        | 1.93, 25.01                                                                                                                                            |
| <i>T</i> /K                                                      | 173(2)                                                                                        | 296(2)                                                                                                             | 173(2)                                                                                                                                                 |
| no. of data collected                                            | 33822                                                                                         | 19214                                                                                                              | 10716                                                                                                                                                  |
| no. of unique data                                               | 6044                                                                                          | 6650                                                                                                               | 3787                                                                                                                                                   |
| no. of refined params                                            | 417                                                                                           | 461                                                                                                                | 258                                                                                                                                                    |
| goodness-of-fit on <i>F</i> <sup>2</sup> <sup>a</sup>            | 1.055                                                                                         | 1.029                                                                                                              | 1.053                                                                                                                                                  |
| Final <i>R</i> indices <sup>b</sup> [ <i>I</i> > 2σ( <i>I</i> )] |                                                                                               |                                                                                                                    |                                                                                                                                                        |
| <i>R</i> 1                                                       | 0.0283                                                                                        | 0.0277                                                                                                             | 0.0460                                                                                                                                                 |
| <i>wR</i> 2                                                      | 0.0631                                                                                        | 0.0679                                                                                                             | 0.1283                                                                                                                                                 |
| <i>R</i> indices (all data)                                      |                                                                                               |                                                                                                                    |                                                                                                                                                        |
| <i>R</i> 1                                                       | 0.0332                                                                                        | 0.0363                                                                                                             | 0.0555                                                                                                                                                 |
| <i>wR</i> 2                                                      | 0.0659                                                                                        | 0.0719                                                                                                             | 0.1345                                                                                                                                                 |

<sup>a</sup> GOF =  $[\sum\omega(F_o^2 - F_c^2)^2 / (n-p)]^{1/2}$ , where  $n$  is the number of reflection and  $p$  is the number of parameters refined. <sup>b</sup>  $R_1 = \Sigma(|F_o| - |F_c|) / \Sigma|F_o|$ ;  $wR_2 = [\Sigma[w(F_o^2 - F_c^2)^2] / \Sigma w(F_o^2)^2]^{1/2}$ .

**Table S2** Summary of crystallographic data for **4-6**

|                                                                   | <b>4</b> ·2DMSO·CH <sub>3</sub> CN                                                                          | <b>5</b> ·CH <sub>3</sub> OH                                                                          | <b>6</b> ·0.75DMSO                                                                                          |
|-------------------------------------------------------------------|-------------------------------------------------------------------------------------------------------------|-------------------------------------------------------------------------------------------------------|-------------------------------------------------------------------------------------------------------------|
| chemical formula                                                  | C <sub>36</sub> H <sub>40</sub> HgI <sub>2</sub> N <sub>4</sub> O <sub>2</sub><br>·2DMSO·CH <sub>3</sub> CN | C <sub>28</sub> H <sub>36</sub> HgI <sub>2</sub> N <sub>4</sub> O <sub>2</sub><br>·CH <sub>3</sub> OH | C <sub>26</sub> H <sub>34</sub> Hg <sub>2</sub> I <sub>4</sub> N <sub>4</sub> O <sub>3</sub> S<br>·0.75DMSO |
| fw                                                                | 1212.42                                                                                                     | 947.04                                                                                                | 1450.01                                                                                                     |
| Cryst syst                                                        | Monoclinic                                                                                                  | Monoclinic                                                                                            | Monoclinic                                                                                                  |
| space group                                                       | <i>P2</i> <sub>1</sub> / <i>c</i>                                                                           | <i>C2</i> / <i>c</i>                                                                                  | <i>P2</i> <sub>1</sub> / <i>c</i>                                                                           |
| <i>a</i> /Å                                                       | 15.477(4)                                                                                                   | 15.437(2)                                                                                             | 8.909(3)                                                                                                    |
| <i>b</i> /Å                                                       | 19.092(5)                                                                                                   | 15.405(2)                                                                                             | 26.074(1)                                                                                                   |
| <i>c</i> /Å                                                       | 16.200(4)                                                                                                   | 15.041(2)                                                                                             | 17.047(7)                                                                                                   |
| <i>α</i> /deg                                                     | 90                                                                                                          | 90.00                                                                                                 | 90                                                                                                          |
| <i>β</i> /deg                                                     | 93.1(5)                                                                                                     | 108.0(2)                                                                                              | 97.6(1)                                                                                                     |
| <i>γ</i> /deg                                                     | 90                                                                                                          | 90.00                                                                                                 | 90                                                                                                          |
| <i>V</i> /Å <sup>3</sup>                                          | 4780(2)                                                                                                     | 3400.2(9)                                                                                             | 3924.8(3)                                                                                                   |
| <i>Z</i>                                                          | 4                                                                                                           | 4                                                                                                     | 4                                                                                                           |
| <i>D</i> <sub>calcd</sub> , Mg/m <sup>3</sup>                     | 1.685                                                                                                       | 1.850                                                                                                 | 2.487                                                                                                       |
| Abs coeff, mm <sup>-1</sup>                                       | 4.642                                                                                                       | 6.375                                                                                                 | 11.103                                                                                                      |
| <i>F</i> (000)                                                    | 2368                                                                                                        | 1808                                                                                                  | 2688                                                                                                        |
| Cryst size, mm                                                    | 0.18 × 0.17 × 0.15                                                                                          | 0.18 × 0.14 × 0.13                                                                                    | 0.18 × 0.17 × 0.16                                                                                          |
| <i>θ</i> <sub>min</sub> , <i>θ</i> <sub>max</sub> , deg           | 1.32, 25.01                                                                                                 | 1.92, 25.01                                                                                           | 1.56, 25.01                                                                                                 |
| <i>T</i> /K                                                       | 296(2)                                                                                                      | 296(2)                                                                                                | 296(2)                                                                                                      |
| no. of data collected                                             | 24279                                                                                                       | 8584                                                                                                  | 20059                                                                                                       |
| no. of unique data                                                | 8435                                                                                                        | 2990                                                                                                  | 6899                                                                                                        |
| no. of refined params                                             | 527                                                                                                         | 187                                                                                                   | 440                                                                                                         |
| goodness-of-fit on <i>F</i> <sup>2</sup> <sup>a</sup>             | 1.030                                                                                                       | 1.074                                                                                                 | 1.039                                                                                                       |
| Final <i>R</i> indices <sup>b</sup> [ <i>I</i><br>2σ( <i>I</i> )] |                                                                                                             |                                                                                                       |                                                                                                             |
| <i>R</i> 1                                                        | 0.0459                                                                                                      | 0.0308                                                                                                | 0.0316                                                                                                      |
| <i>wR</i> 2                                                       | 0.1183                                                                                                      | 0.0860                                                                                                | 0.0772                                                                                                      |
| <i>R</i> indices (all data)                                       |                                                                                                             |                                                                                                       |                                                                                                             |
| <i>R</i> 1                                                        | 0.0691                                                                                                      | 0.0336                                                                                                | 0.0361                                                                                                      |
| <i>wR</i> 2                                                       | 0.1327                                                                                                      | 0.0878                                                                                                | 0.0795                                                                                                      |

<sup>a</sup> GOF =  $[\sum\omega(F_o^2 - F_c^2)^2 / (n-p)]^{1/2}$ , where  $n$  is the number of reflection and  $p$  is the number of parameters refined. <sup>b</sup>  $R_1 = \Sigma(|F_o| - |F_c|) / \Sigma|F_o|$ ;  $wR_2 = [\Sigma[w(F_o^2 - F_c^2)^2] / \Sigma w(F_o^2)^2]^{1/2}$ .

**Table S3** Summary of crystallographic data for **7** and **8**

|                                                                  | <b>7</b>                                                                         | <b>8</b>                                                                         |
|------------------------------------------------------------------|----------------------------------------------------------------------------------|----------------------------------------------------------------------------------|
| chemical formula                                                 | C <sub>40</sub> H <sub>34</sub> AgF <sub>6</sub> N <sub>6</sub> O <sub>2</sub> P | C <sub>36</sub> H <sub>40</sub> AgF <sub>6</sub> N <sub>4</sub> O <sub>2</sub> P |
| fw                                                               | 883.57                                                                           | 813.56                                                                           |
| Cryst syst                                                       | Monoclinic                                                                       | Monoclinic                                                                       |
| space group                                                      | <i>P2<sub>1</sub>/c</i>                                                          | <i>C2/c</i>                                                                      |
| <i>a</i> /Å                                                      | 15.391(3)                                                                        | 16.501(6)                                                                        |
| <i>b</i> /Å                                                      | 17.539(3)                                                                        | 16.221(6)                                                                        |
| <i>c</i> /Å                                                      | 15.492(3)                                                                        | 15.435(6)                                                                        |
| <i>α</i> /deg                                                    | 90                                                                               | 90                                                                               |
| <i>β</i> /deg                                                    | 119.0(3)                                                                         | 119.0(5)                                                                         |
| <i>γ</i> /deg                                                    | 90                                                                               | 90                                                                               |
| <i>V</i> /Å <sup>3</sup>                                         | 3657.5(1)                                                                        | 3611.0(2)                                                                        |
| <i>Z</i>                                                         | 4                                                                                | 4                                                                                |
| <i>D</i> <sub>calcd</sub> , Mg/m <sup>3</sup>                    | 1.605                                                                            | 1.496                                                                            |
| Abs coeff, mm <sup>-1</sup>                                      | 0.672                                                                            | 0.671                                                                            |
| <i>F</i> (000)                                                   | 1792                                                                             | 1664                                                                             |
| Cryst size, mm                                                   | 0.18 × 0.17 × 0.16                                                               | 0.18 × 0.17 × 0.16                                                               |
| <i>θ</i> <sub>min</sub> , <i>θ</i> <sub>max</sub> , deg          | 1.51, 25.01                                                                      | 1.89, 25.01                                                                      |
| <i>T</i> /K                                                      | 173(2)                                                                           | 296(2)                                                                           |
| no. of data collected                                            | 18489                                                                            | 9168                                                                             |
| no. of unique data                                               | 6436                                                                             | 3191                                                                             |
| no. of refined params                                            | 505                                                                              | 229                                                                              |
| goodness-of-fit on <i>F</i> <sup>2</sup> <sup>a</sup>            | 1.039                                                                            | 1.048                                                                            |
| Final <i>R</i> indices <sup>b</sup> [ <i>I</i> > 2σ( <i>I</i> )] |                                                                                  |                                                                                  |
| <i>R</i> 1                                                       | 0.0450                                                                           | 0.0347                                                                           |
| <i>wR</i> 2                                                      | 0.1103                                                                           | 0.0921                                                                           |
| <i>R</i> indices (all data)                                      |                                                                                  |                                                                                  |
| <i>R</i> 1                                                       | 0.0569                                                                           | 0.0387                                                                           |
| <i>wR</i> 2                                                      | 0.1198                                                                           | 0.0957                                                                           |

<sup>a</sup> GOF =  $[\sum \omega(F_o^2 - F_c^2)^2 / (n-p)]^{1/2}$ , where *n* is the number of reflection and *p* is the number of parameters refined. <sup>b</sup>  $R_1 = \sum(|F_o| - |F_c|) / \sum |F_o|$ ;  $wR_2 = [\sum [w(F_o^2 - F_c^2)^2] / \sum w(F_o^2)^2]^{1/2}$ .

### 3. The dihedral angles of complexes 2-8

**Table S4** In the same ligand of **2-8**, the dihedral angles (°) between two benzimidazole (or imidazole) rings (A), and the dihedral angles (°) between naphthalene ring and two imidazole (or benzimidazole) rings (B)

| Complexes | A       | B                |
|-----------|---------|------------------|
| <b>2</b>  | 50.9(3) | 73.5(3), 78.8(4) |
| <b>3</b>  | 59.0(9) | 80.1(8), 80.8(9) |
| <b>4</b>  | 53.6(7) | 77.7(1), 79.7(5) |
| <b>5</b>  | 50.6(4) | 85.0(5), 87.4(5) |
| <b>6</b>  | 56.0(6) | 68.9(6), 85.1(4) |
| <b>7</b>  | 52.1(2) | 75.2(3), 82.5(3) |
| <b>8</b>  | 56.9(1) | 77.7(3), 78.6(3) |

### 4. The distances of $\pi$ - $\pi$ stacking interactions, distances (Å) and angles of C-H $\cdots$ $\pi$ contacts and H-Bonding geometry of complexes 1-8

**Table S5** Distances (Å) of  $\pi$ - $\pi$  stacking interactions, and distances (Å) and angles (°) of C-H $\cdots$  $\pi$  contacts for **1-8**

| Complexes | $\pi$ - $\pi$                                        |                                                      | C-H $\cdots$ $\pi$   |                      |
|-----------|------------------------------------------------------|------------------------------------------------------|----------------------|----------------------|
|           | Face-to-face                                         | Center-to-center                                     | H $\cdots$ $\pi$     | C-H $\cdots$ $\pi$   |
| <b>1</b>  | 3.362(4) (benzimidazole and naphthalene)             | 3.596(1) (benzimidazole and naphthalene)             | –                    | –                    |
| <b>2</b>  | 3.478(8) (benzimidazole)                             | 3.629(5) (benzimidazole)                             | 2.823(4)<br>3.095(4) | 163.0(3)<br>138.9(4) |
| <b>3</b>  | 3.518(1) (benzimidazole)                             | 3.817(3) (benzimidazole)                             | –                    | –                    |
| <b>4</b>  | 3.646(1) (benzimidazole)                             | 3.860(1) (benzimidazole)                             | 3.156(6)             | 132.4(8)             |
| <b>5</b>  | 3.683(9) (imidazole)                                 | 4.004(4) (imidazole)                                 | 3.041(4)             | 158.0(4)             |
| <b>6</b>  | –                                                    | –                                                    | 2.766(1)             | 144.5(4)             |
| <b>7</b>  | 3.433(4) (benzimidazole)<br>3.314(4) (benzimidazole) | 3.376(4) (benzimidazole)<br>4.035(2) (benzimidazole) | 2.997(6)             | 154.2(2)             |
| <b>8</b>  | 3.597(4) (benzimidazole)                             | 3.712(9) (benzimidazole)                             | 2.958(9)             | 129.1(3)             |

**Table S6** H-Bonding Geometry for **1**

|          | D-H $\cdots$ A                           | D-H (Å)  | H $\cdots$ A (Å) | D $\cdots$ A (Å) | D-H $\cdots$ A (°) |
|----------|------------------------------------------|----------|------------------|------------------|--------------------|
| <b>1</b> | C(1)-H(1A) $\cdots$ Cl(6) <sup>i</sup>   | 0.978(3) | 2.776(9)         | 3.734(3)         | 165.9(2)           |
|          | C(30)-H(30) $\cdots$ Cl(2) <sup>ii</sup> | 0.949(3) | 2.849(9)         | 3.474(3)         | 124.3(1)           |

Symmetry code: i:  $x, 1 + y, z$ , ii:  $-0.5 + x, 1 + y, 0.5 - z$  for **1**.

## 5. The crystal packings of complexes 1-8

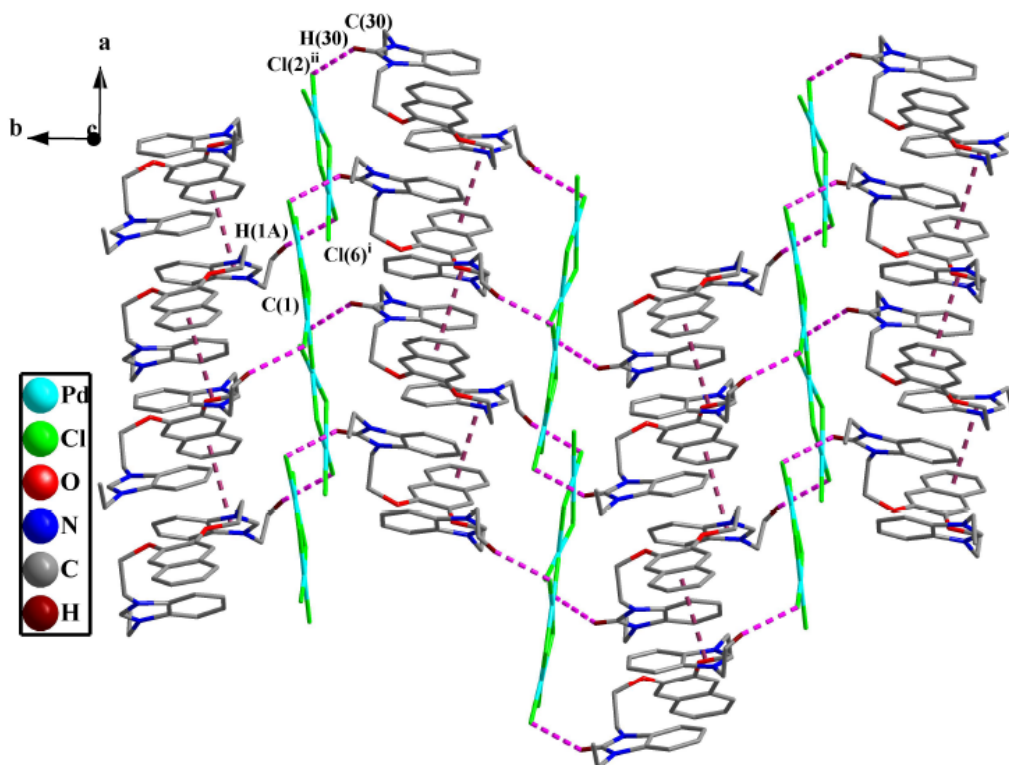

**Fig. S1** 2D supramolecular layer of complex **1** via  $\pi$ - $\pi$  stacking interactions and C-H...Cl hydrogen bonds. All hydrogen atoms except those participating in C-H...Cl hydrogen bonds were omitted for clarity.

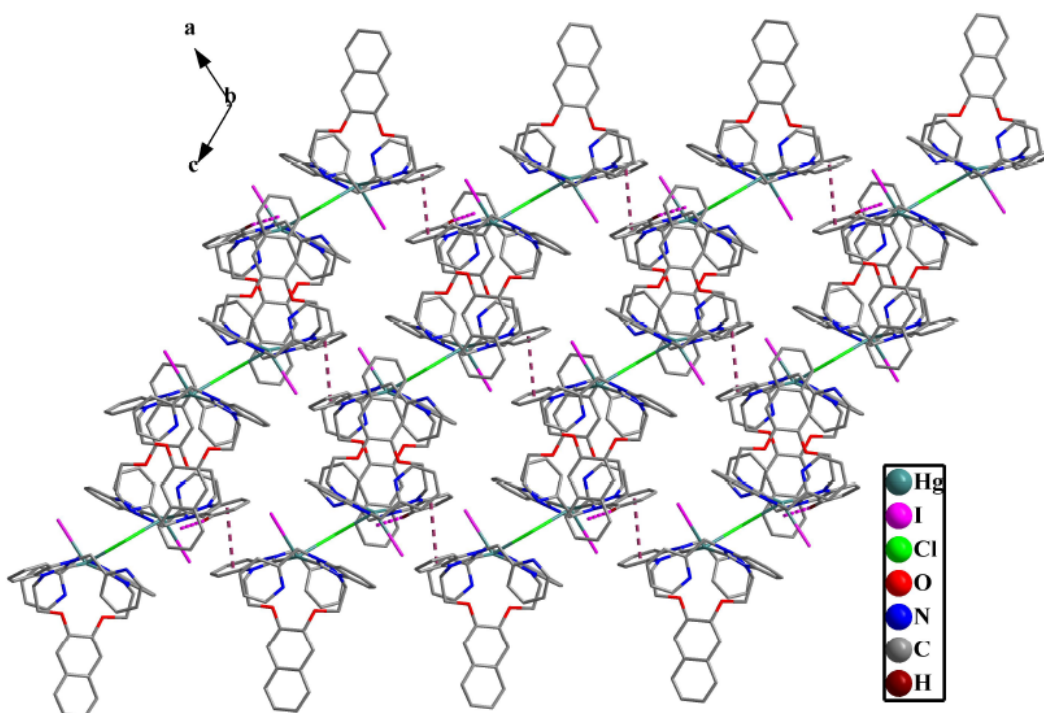

**Fig. S2(a)** 2D supramolecular layer of complex **2** via C-H $\cdots$  $\pi$  contacts and  $\pi$ - $\pi$  stacking interactions. All hydrogen atoms except those participating in C-H $\cdots$  $\pi$  hydrogen bonds were omitted for clarity.

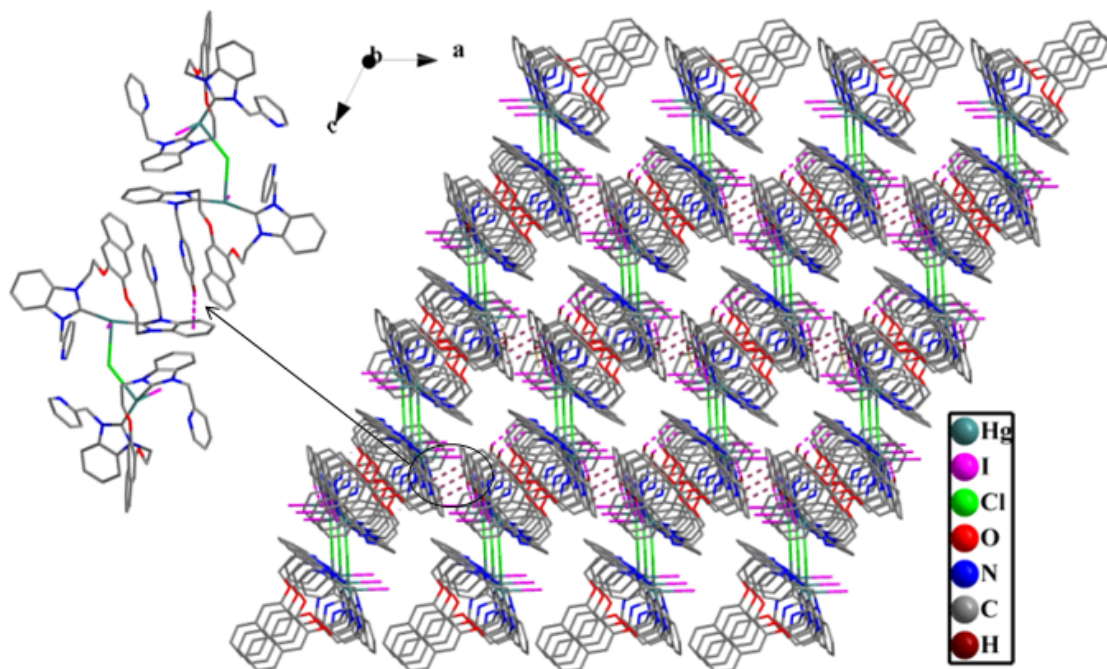

**Fig. S2(b)** 3D supramolecular network of complex **2** via  $\pi$ - $\pi$  stacking interactions and C-H $\cdots$  $\pi$  contacts. All hydrogen atoms except those participating in C-H $\cdots$  $\pi$  hydrogen bonds were omitted for clarity.

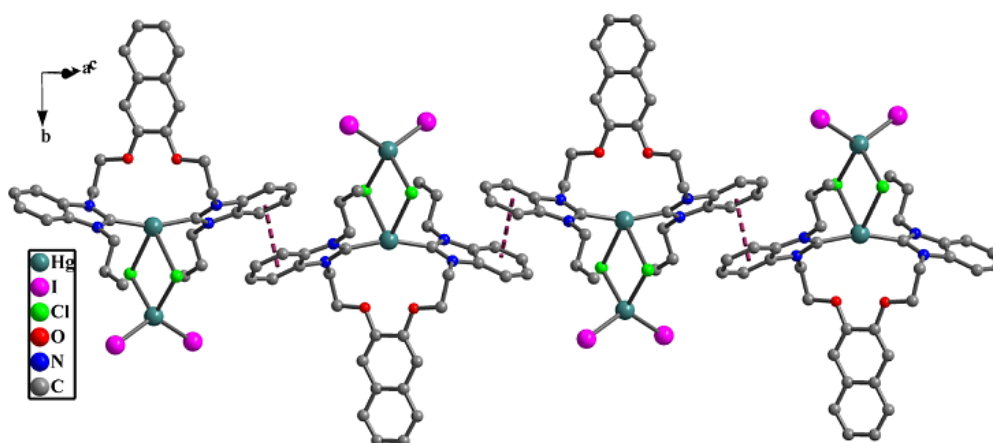

**Fig. S3** 1D chain of complex **3** via  $\pi$ - $\pi$  stacking interactions. All hydrogen atoms were omitted for clarity.

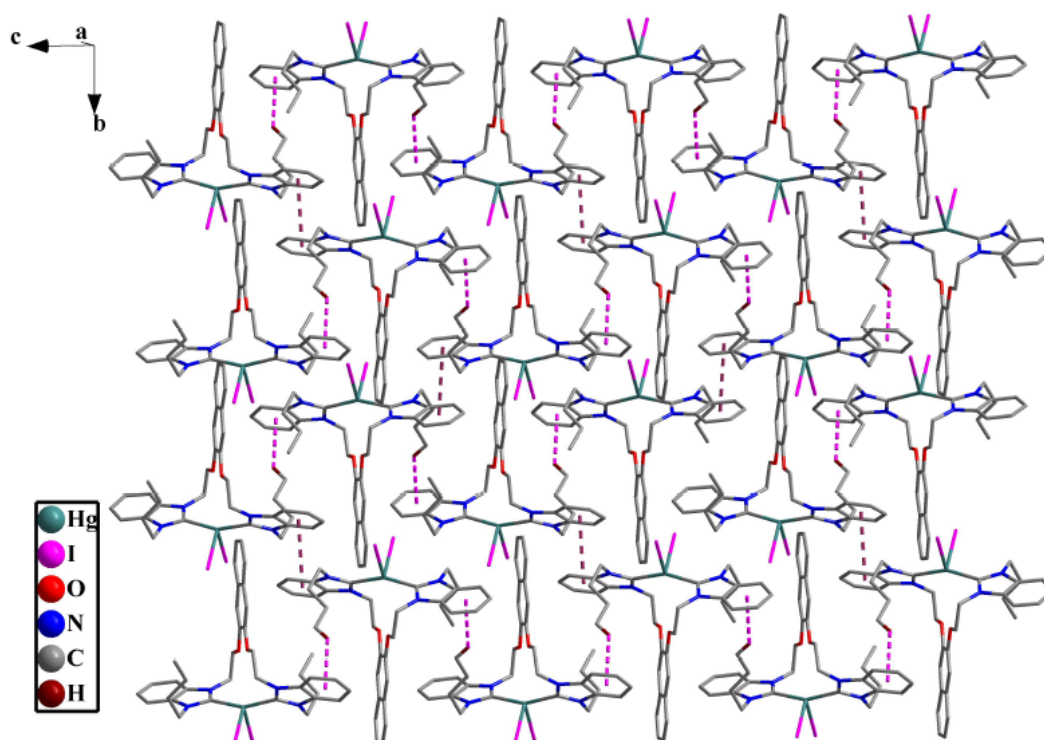

**Fig. S4** 2D supramolecular layer of complex **4** via  $\pi$ - $\pi$  stacking interactions and C-H $\cdots$  $\pi$  contacts. All hydrogen atoms except those participating in C-H $\cdots$  $\pi$  hydrogen bonds were omitted for clarity.

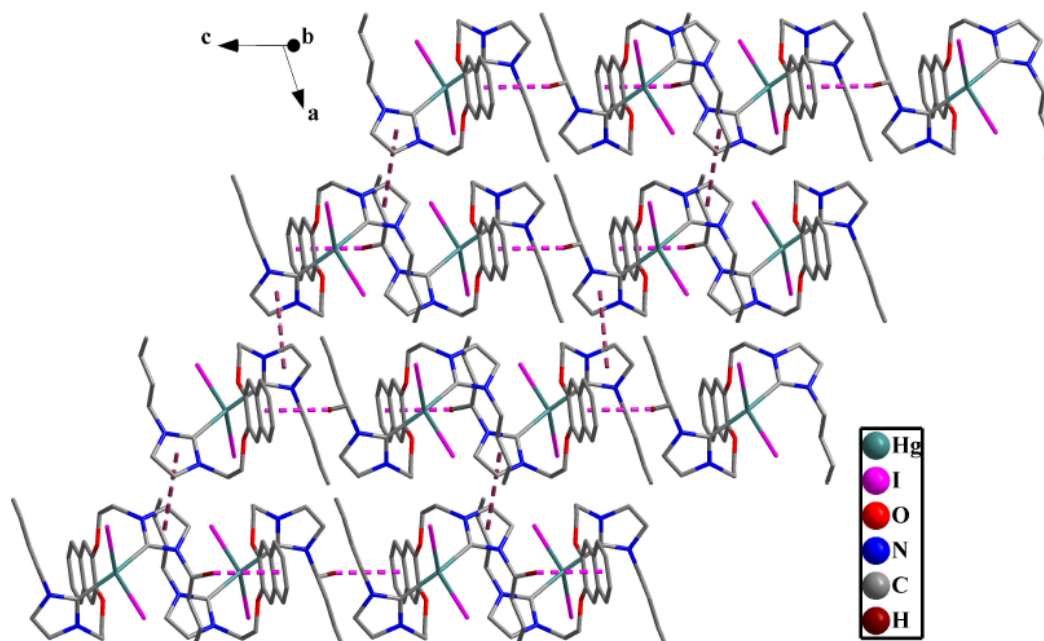

**Fig. S5(a)** 2D supramolecular layer of complex **5** via C-H $\cdots$  $\pi$  contacts and  $\pi$ - $\pi$  stacking interactions. All hydrogen atoms except those participating in C-H $\cdots$  $\pi$  hydrogen bonds were omitted for clarity.



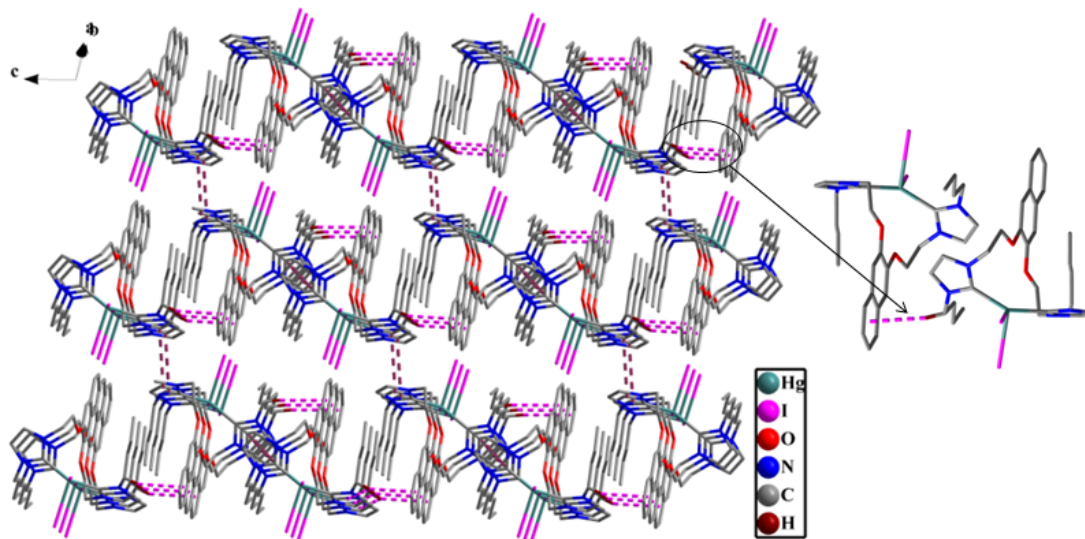

**Fig. S5(b)** 3D supramolecular network of complex **5** via  $\pi$ - $\pi$  stacking interactions and C-H $\cdots$  $\pi$  contacts. All hydrogen atoms except those participating in C-H $\cdots$  $\pi$  hydrogen bonds were omitted for clarity.

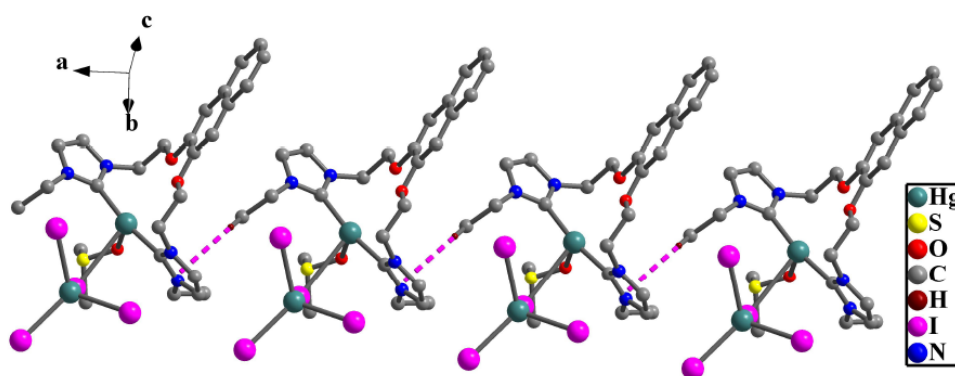

**Fig. S6** 1D chain of complex **6** via C-H $\cdots$  $\pi$  contacts. All hydrogen atoms except those participating in C-H $\cdots$  $\pi$  hydrogen bonds were omitted for clarity.

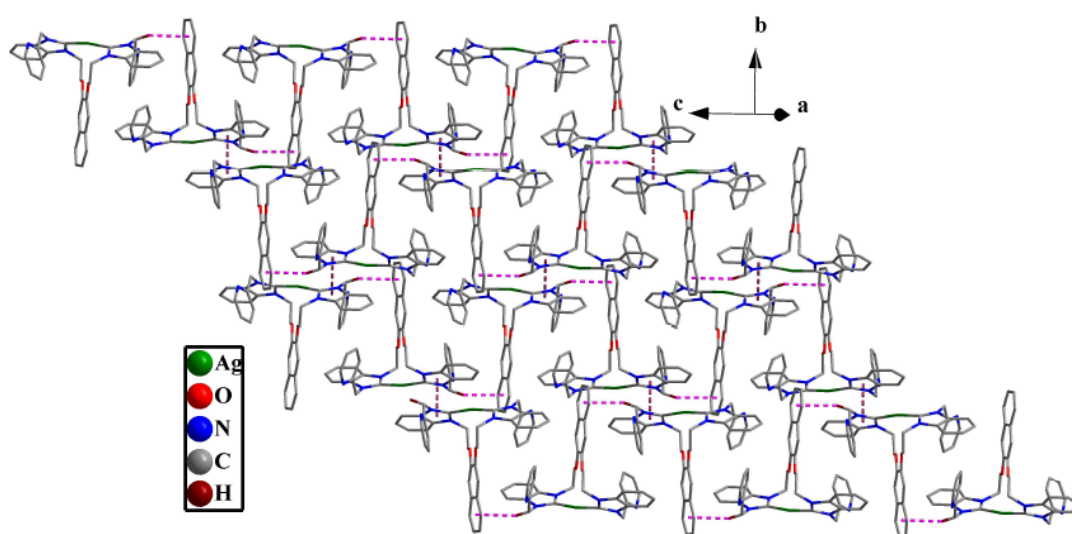

**Fig. S7(a)** 2D supramolecular layer of complex **7** via  $\pi$ - $\pi$  stacking interactions and C-H $\cdots$  $\pi$  contacts. All hydrogen atoms except those participating in C-H $\cdots$  $\pi$  hydrogen bonds were omitted for clarity.

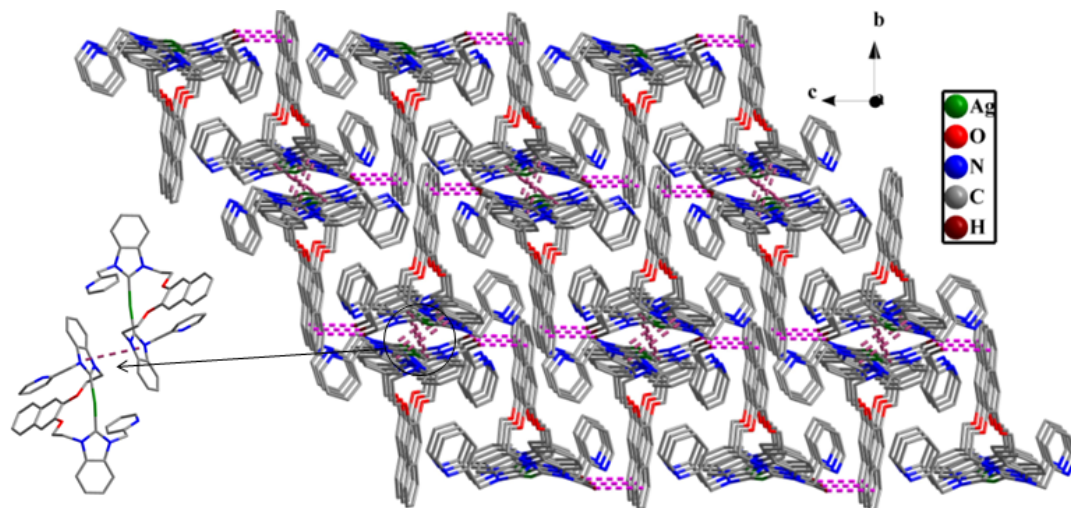

**Fig. S7(b)** 3D supramolecular network of complex **7**  $\pi$ - $\pi$  stacking interactions and C-H $\cdots$  $\pi$  contacts. All hydrogen atoms except those participating in C-H $\cdots$  $\pi$  hydrogen bonds were omitted for clarity.

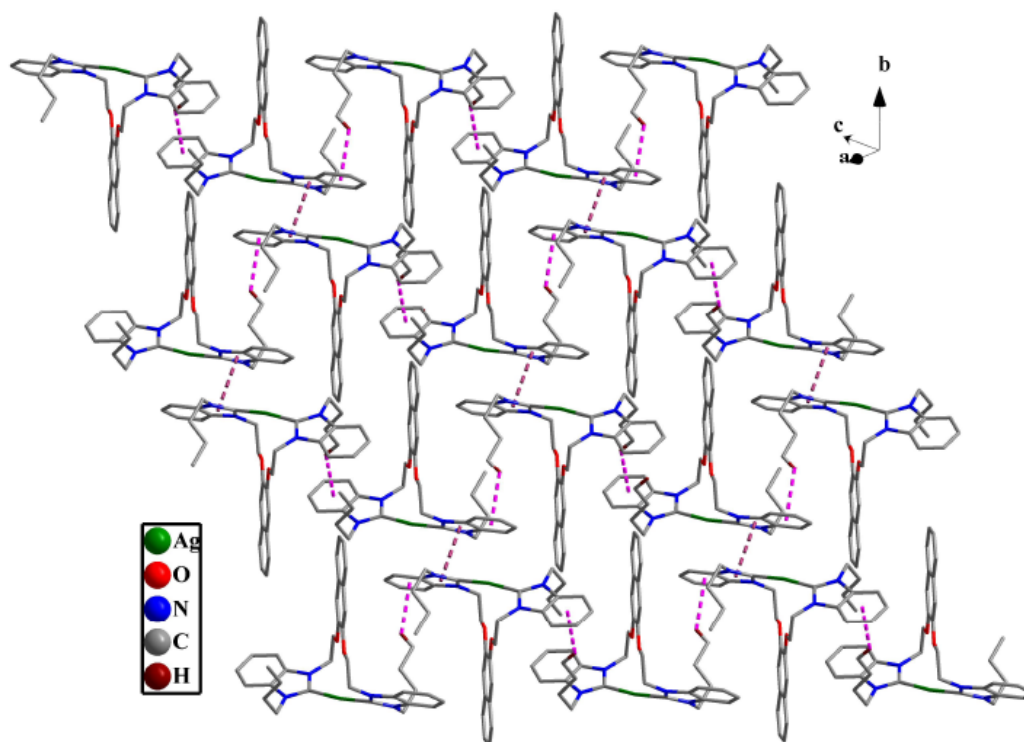

**Fig. S8(a)** 2D supramolecular layer of complex **8** via C-H $\cdots$  $\pi$  contacts and  $\pi$ - $\pi$  stacking interactions. All hydrogen atoms except those participating in C-H $\cdots$  $\pi$  hydrogen bonds were omitted for clarity.

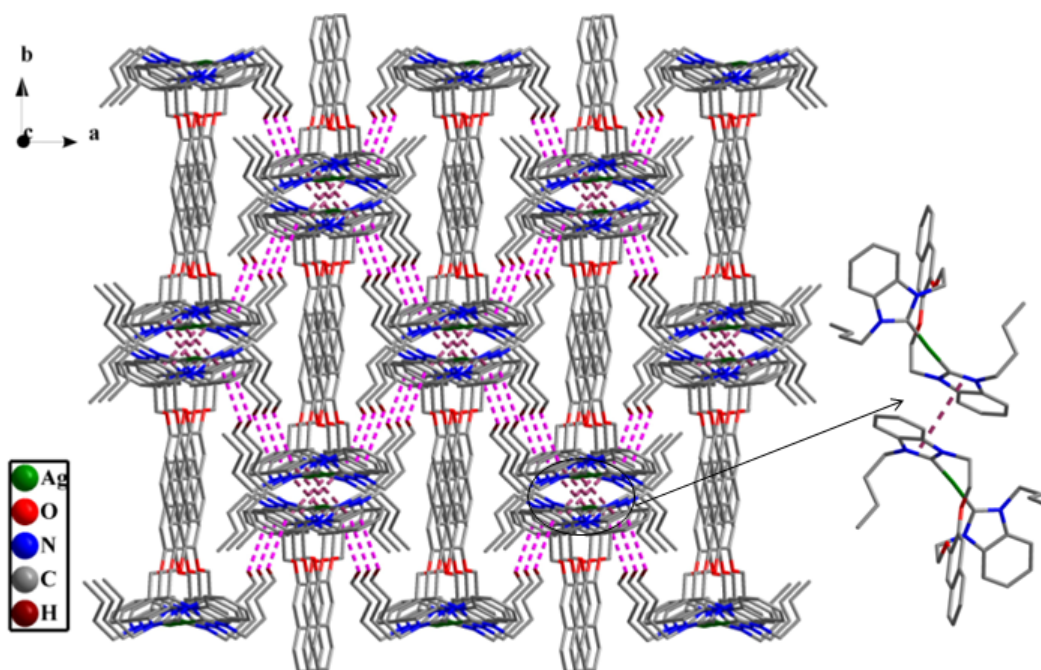

**Fig. S8(b)** 3D supramolecular network of complex **8** via C-H... $\pi$  contacts and  $\pi$ - $\pi$  stacking interactions. All hydrogen atoms except those participating in C-H... $\pi$  hydrogen bonds were omitted for clarity.

#### 6. The UV/Vis and fluorescence studies of complex 4

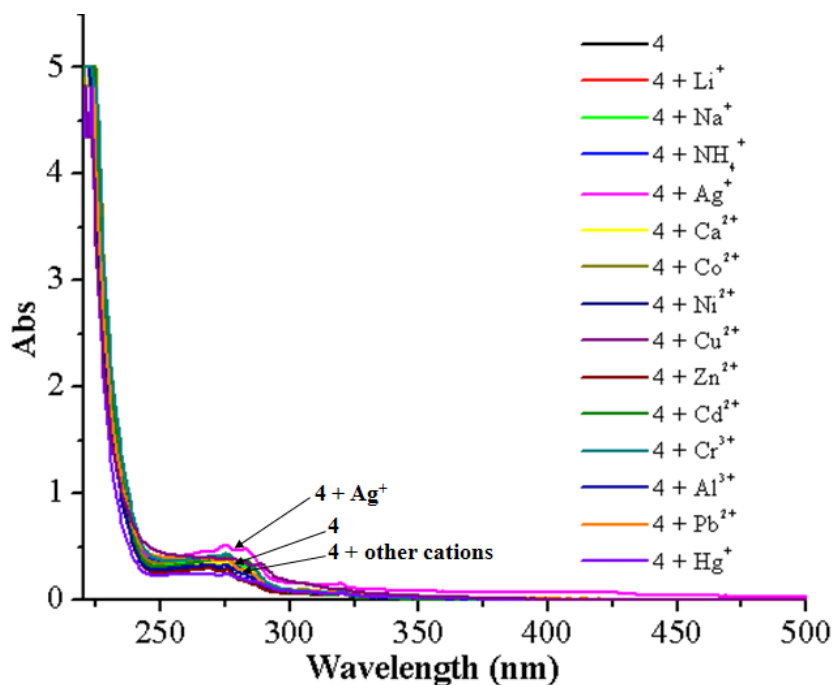

**Fig. S9** UV-vis absorption spectra of **4** (1  $\times$  10<sup>-5</sup> mol/L) and upon the addition of salts (30.0 equiv) of Li<sup>+</sup>, Na<sup>+</sup>, NH<sub>4</sub><sup>+</sup>, Ag<sup>+</sup>, Ca<sup>2+</sup>, Co<sup>2+</sup>, Ni<sup>2+</sup>, Cu<sup>2+</sup>, Zn<sup>2+</sup>, Cd<sup>2+</sup>, Cr<sup>3+</sup>, Al<sup>3+</sup>, Pb<sup>2+</sup> and Hg<sup>2+</sup> in CH<sub>3</sub>OH at 25 °C.

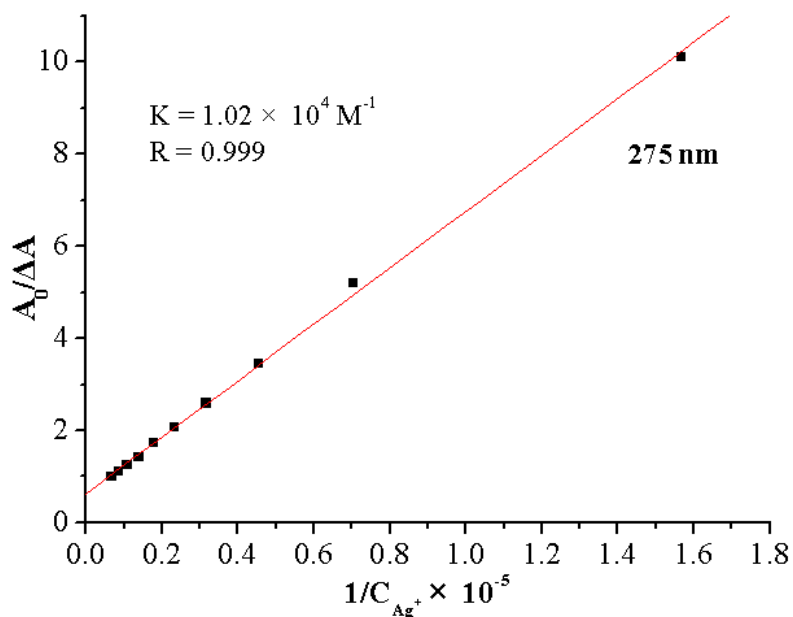

**Fig. S10** Benesi-Hildebrand analysis of the absorption changes for the complexation between **4** and  $\text{Ag}^+$  in  $\text{CH}_3\text{OH}$  at  $25^\circ\text{C}$ .

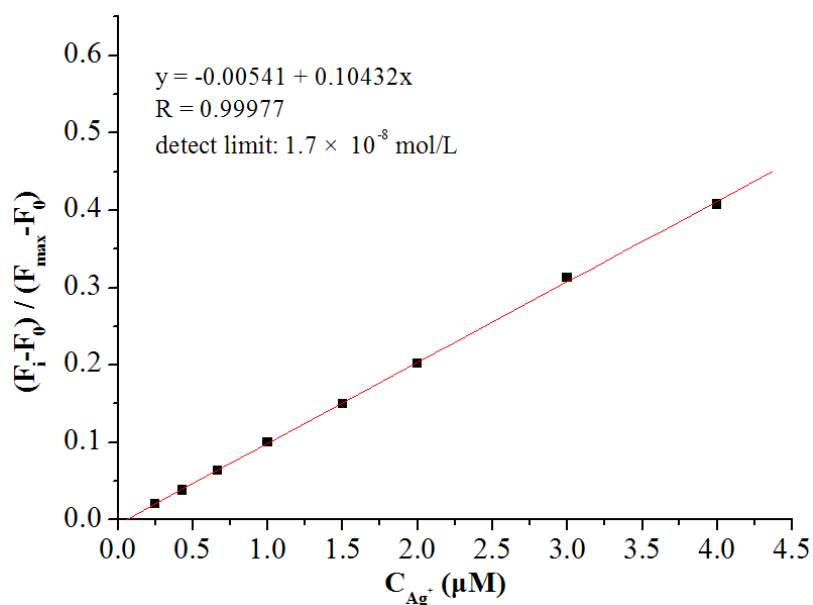

**Fig. S11** Emission (at 338 nm) of **4** at different concentrations of  $\text{Ag}^+$  (0, 0.25, 0.43, 0.67, 1.0, 1.5, 2.0, 3.0, 4.0  $\mu\text{M}$ ) added, normalized between the minimum emission (0.0  $\mu\text{M}$   $\text{Ag}^+$ ) and the emission at 4.0  $\mu\text{M}$   $\text{Ag}^+$  in  $\text{CH}_3\text{OH}$  at  $25^\circ\text{C}$ . The detection limit was determined to be  $1.7 \times 10^{-8} \text{ M}$ .

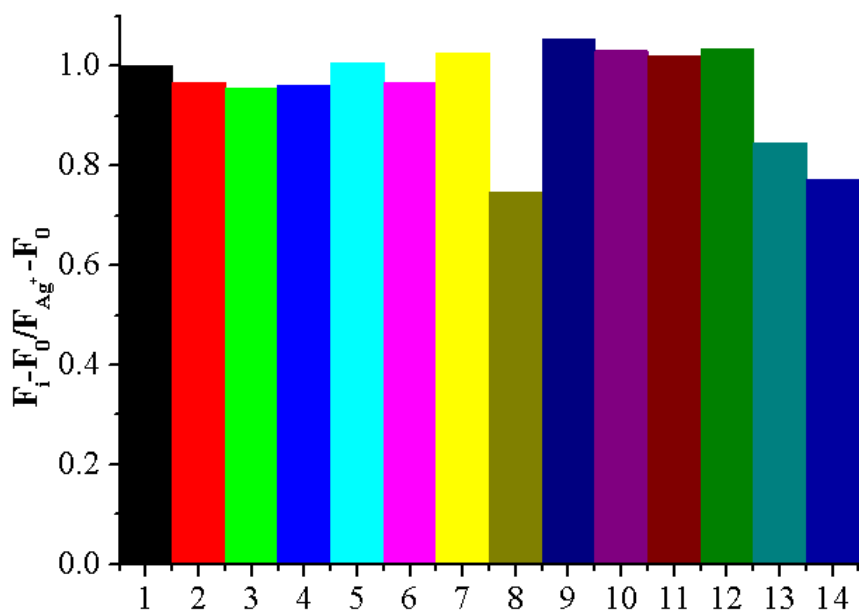

**Fig. S12** Change ratio  $((F_1-F_0)/(F_{Ag^+}-F_0))$  of fluorescence intensity of **4** upon addition of 30 equiv of  $Ag^+$  in the presence of 30 equiv of background anions. 1:  $Ag^+$ ; 2:  $Ag^+ + Li^+$ ; 3:  $Ag^+ + Na^+$ ; 4:  $Ag^+ + NH_4^+$ ; 5:  $Ag^+ + Ca^{2+}$ ; 6:  $Ag^+ + Co^{2+}$ ; 7:  $Ag^+ + Ni^{2+}$ ; 8:  $Ag^+ + Cu^{2+}$ ; 9:  $Ag^+ + Zn^{2+}$ ; 10:  $Ag^+ + Cd^{2+}$ ; 11:  $Ag^+ + Cr^{3+}$ ; 12:  $Ag^+ + Al^{3+}$ ; 13:  $Ag^+ + Pb^{2+}$ ; 14:  $Ag^+ + Hg^{2+}$  in  $CH_3OH$  at 25 °C.

### 7. The infrared spectra of complex **4** and $4 \cdot AgNO_3$

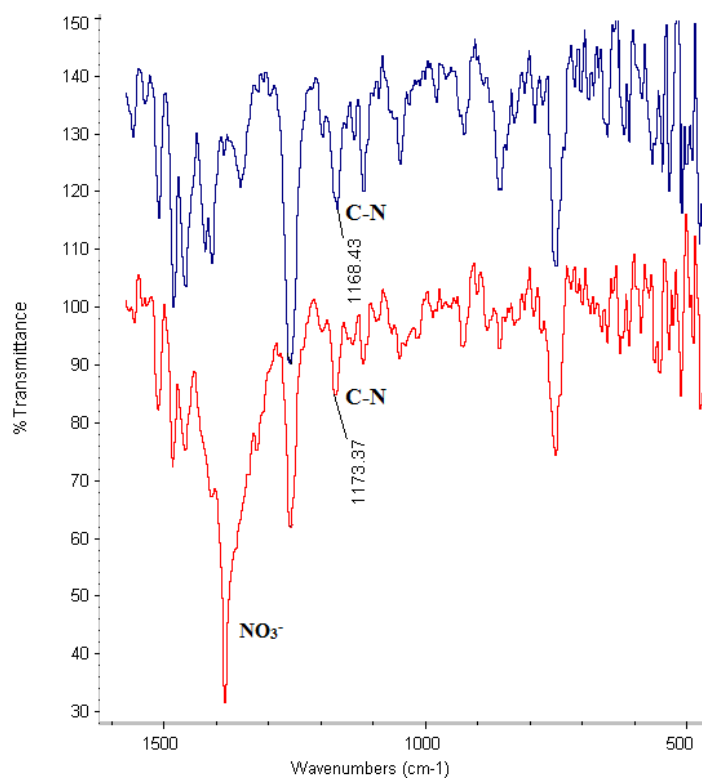

**Fig. S13** Infrared spectroscopy of complex **4** (top) and  $4 \cdot Ag^+$  (bottom).

## 8. The $^1\text{H}$ NMR and $^{13}\text{C}$ NMR spectra of precursors and complexes 1-8

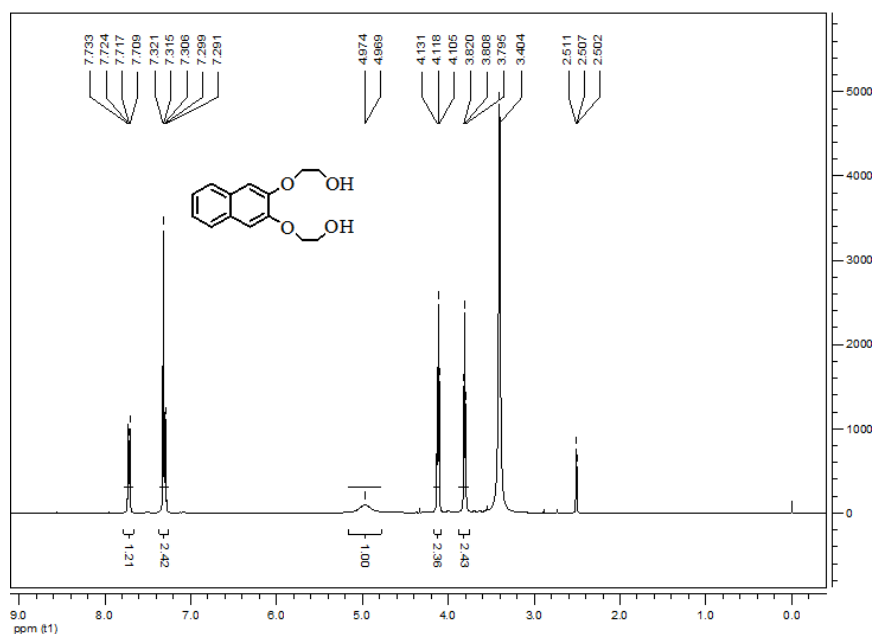

**Fig. S14** The  $^1\text{H}$  NMR (400 MHz,  $\text{DMSO-d}_6$ ) spectra of 2,3-bis(2'-hydroxyethoxy)naphthalene.

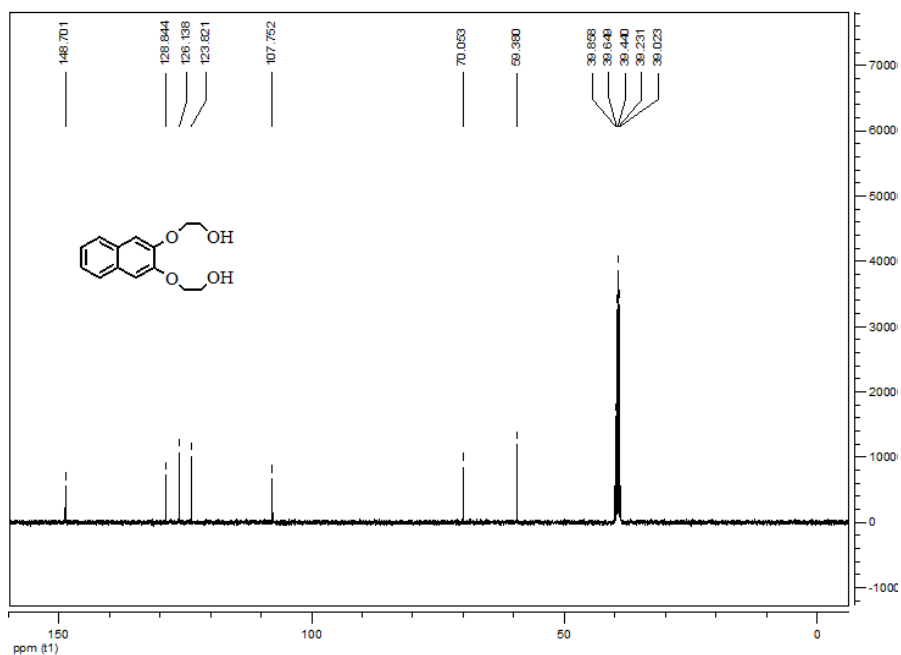

**Fig. S15** The  $^{13}\text{C}$  NMR (400 MHz,  $\text{DMSO-d}_6$ ) spectra of 2,3-bis(2'-hydroxyethoxy)naphthalene.

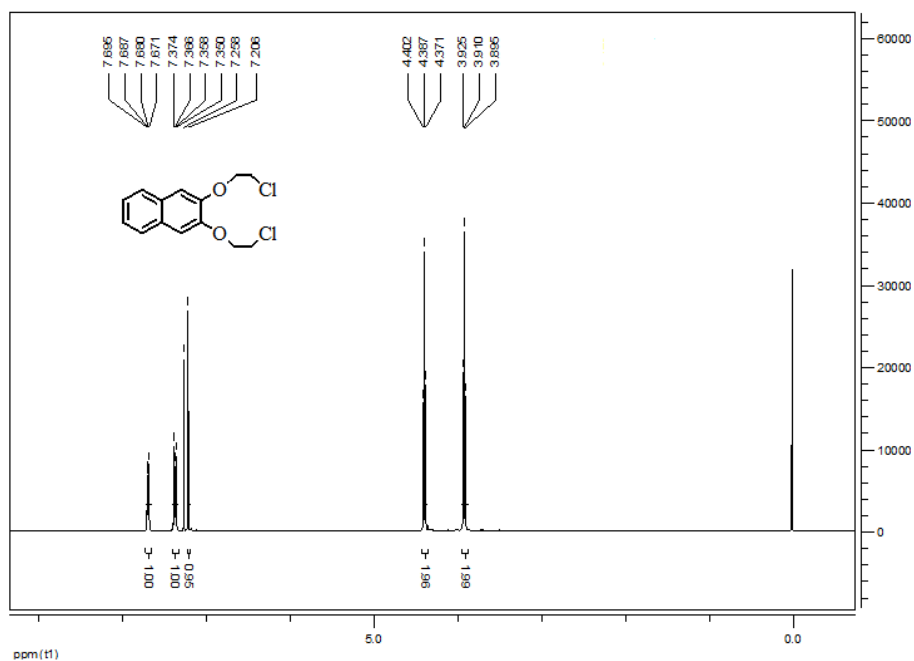

**Fig. S16** The  $^1\text{H}$  NMR (400 MHz,  $\text{CDCl}_3$ ) spectra of 2,3-bis(2'-chloroethoxy)naphthalene.

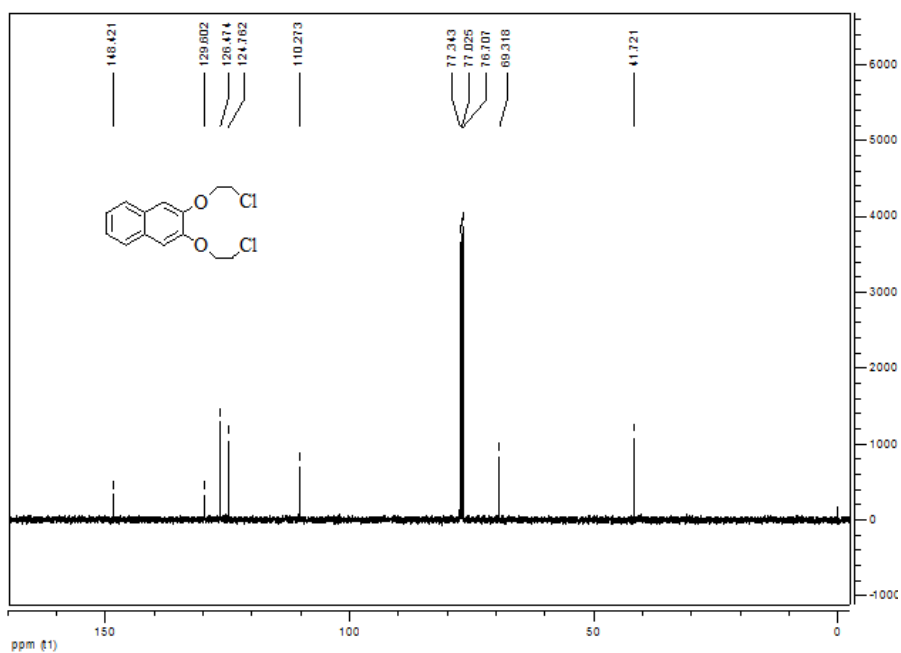

**Fig. S17** The  $^{13}\text{C}$  NMR (100 MHz,  $\text{CDCl}_3$ ) spectra of 2,3-bis(2'-chloroethoxy)naphthalene.

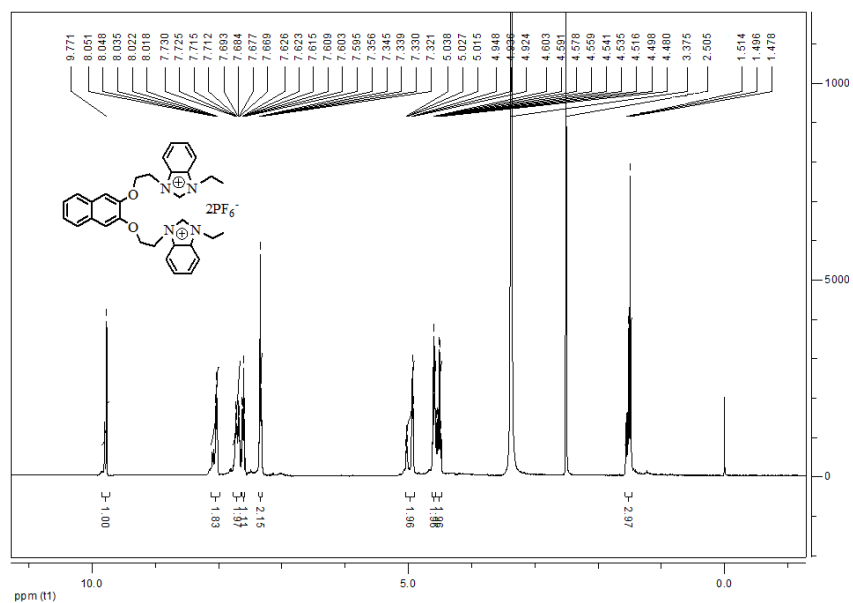

**Fig. S18** The  $^1H$  NMR (400 MHz, DMSO- $d_6$ ) spectra of  $L^1H_2 \cdot (PF_6)_2$ .

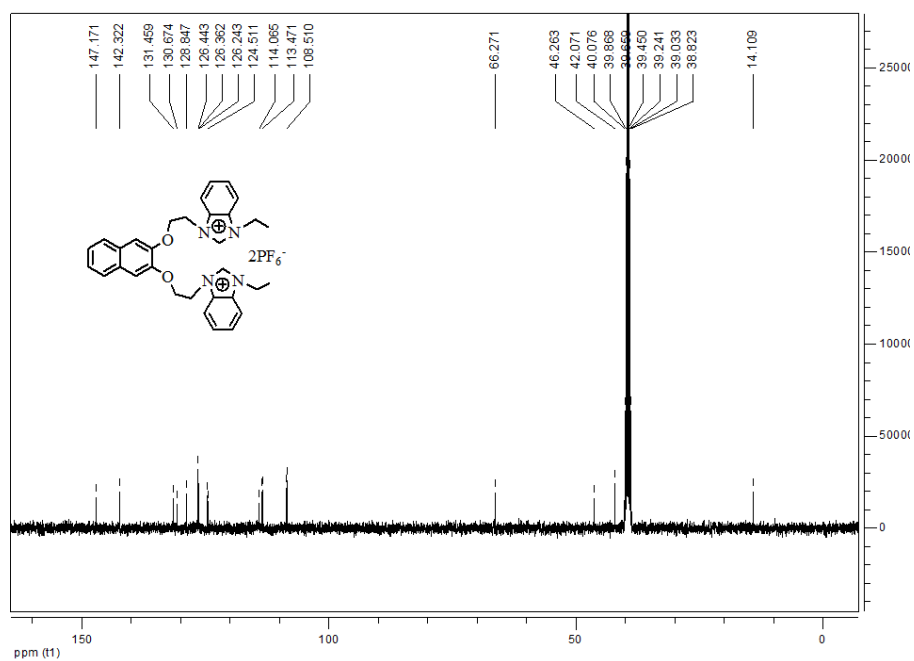

**Fig. S19** The  $^{13}C$  NMR (100 MHz, DMSO- $d_6$ ) spectra of  $L^1H_2 \cdot (PF_6)_2$ .



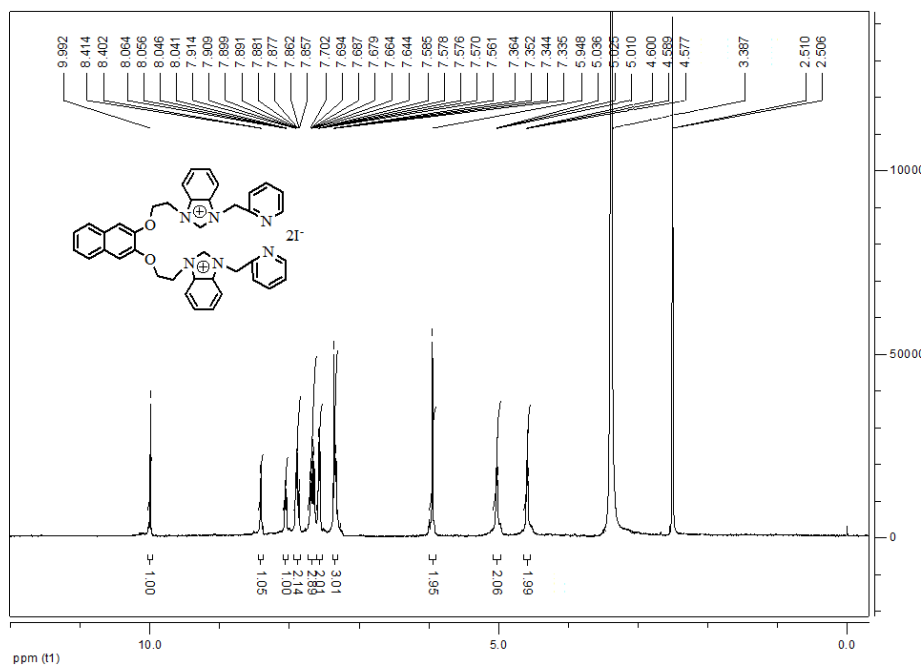

**Fig. S20** The  $^1H$  NMR (400 MHz, DMSO- $d_6$ ) spectra of  $L^2H_2 \cdot I_2$ .

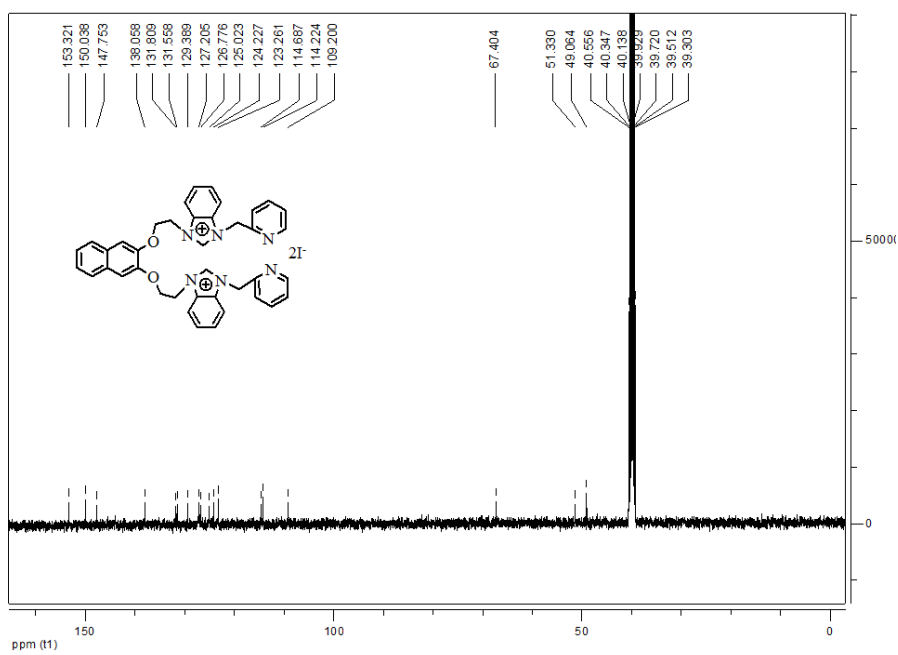

**Fig. S21** The  $^{13}C$  NMR (100 MHz, DMSO- $d_6$ ) spectra of  $L^2H_2 \cdot I_2$ .

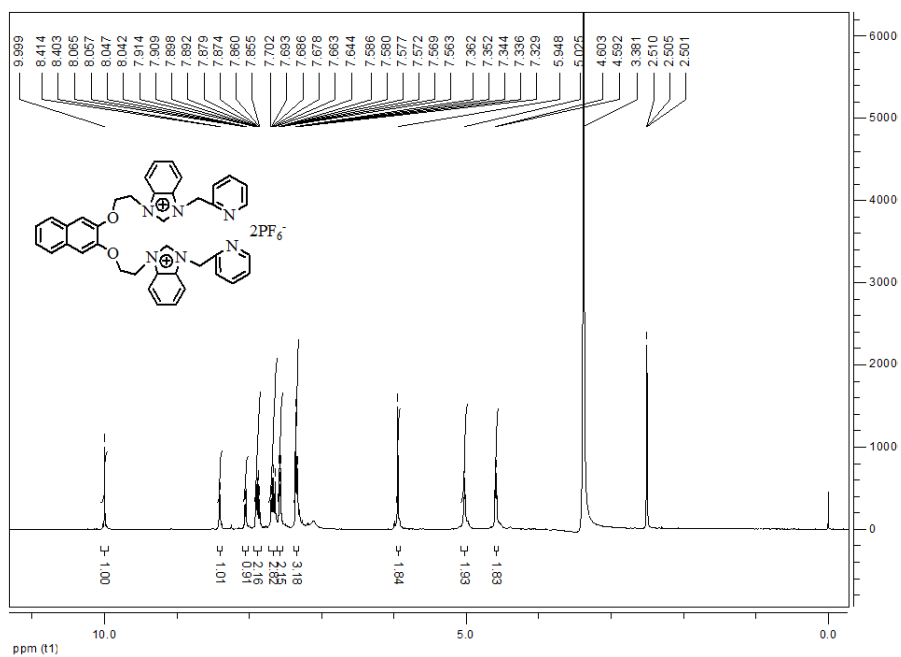

Fig. S22 The  $^1\text{H}$  NMR (400 MHz,  $\text{DMSO-d}_6$ ) spectra of  $\text{L}^2\text{H}_2 \cdot (\text{PF}_6)_2$ .

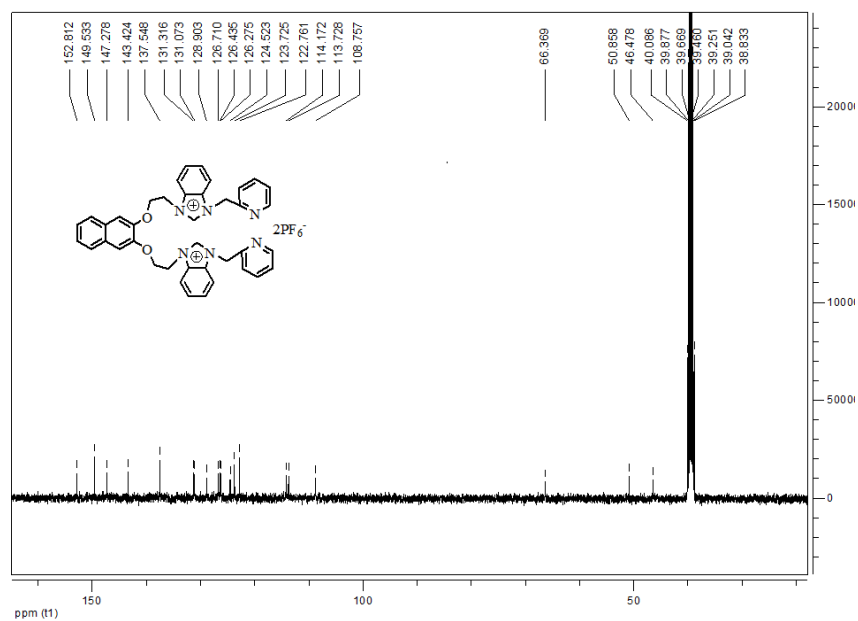

Fig. S23 The  $^{13}\text{C}$  NMR (100 MHz,  $\text{DMSO-d}_6$ ) spectra of  $\text{L}^2\text{H}_2 \cdot (\text{PF}_6)_2$ .

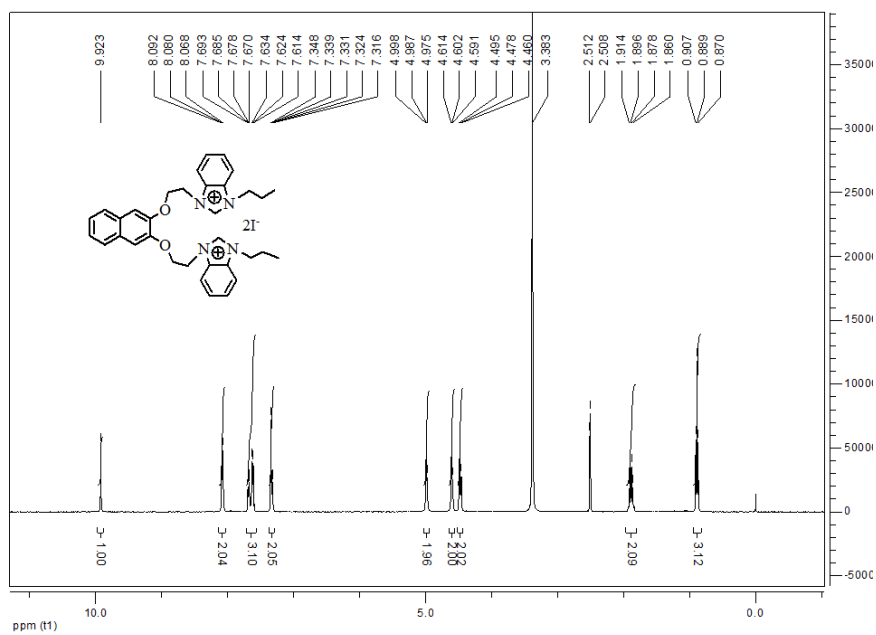

**Fig. S24** The  $^1H$  NMR (400 MHz, DMSO- $d_6$ ) spectra of  $L^3H_2 \cdot I_2$ .

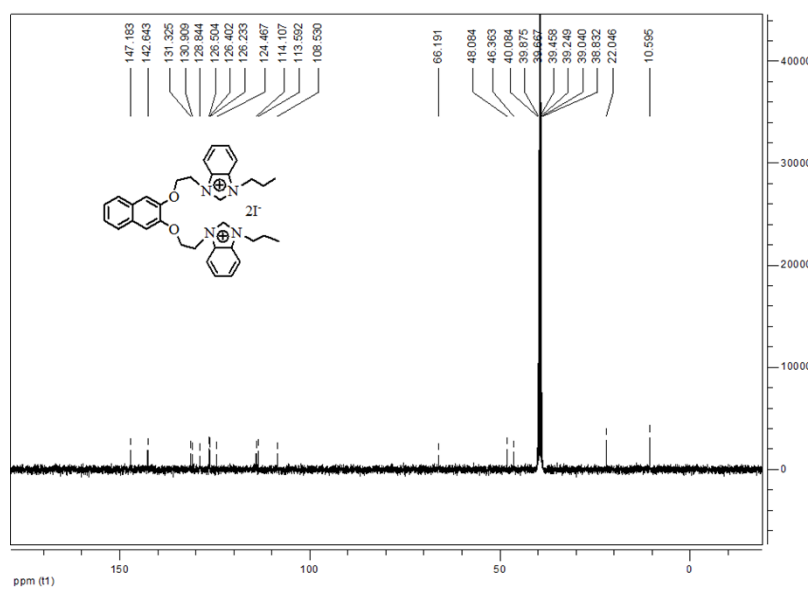

**Fig. S25** The  $^{13}C$  NMR (100 MHz, DMSO- $d_6$ ) spectra of  $L^3H_2 \cdot I_2$ .

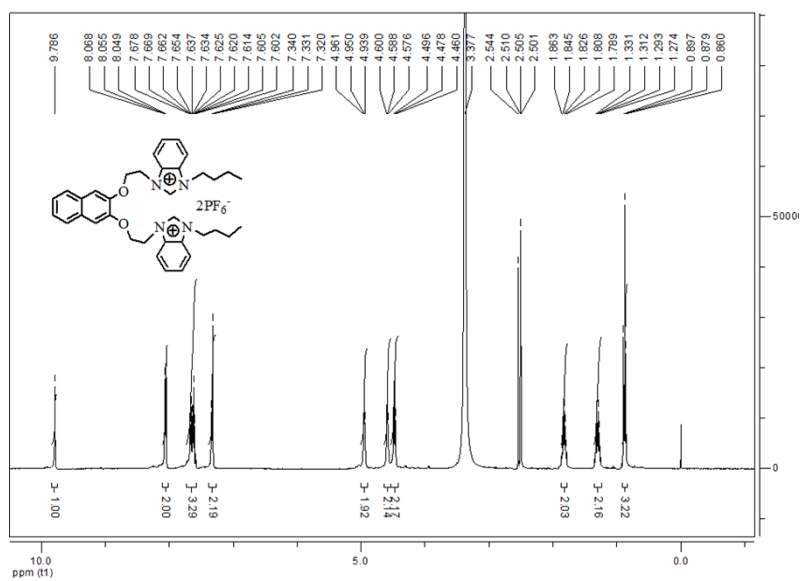

**Fig. S26** The  $^1\text{H}$  NMR (400 MHz,  $\text{DMSO-d}_6$ ) spectra of  $\text{L}^4\text{H}_2 \cdot (\text{PF}_6)_2$ .

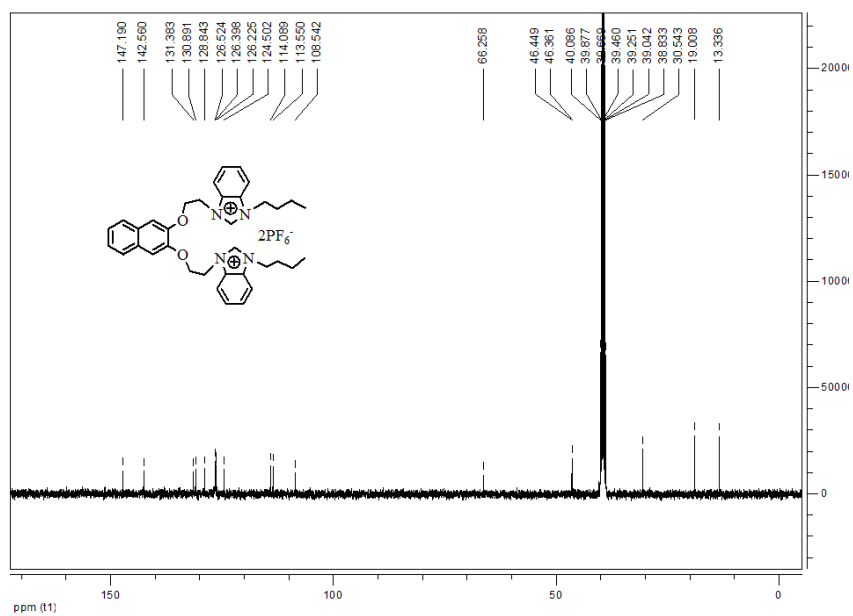

**Fig. S27** The  $^{13}\text{C}$  NMR (100 MHz,  $\text{DMSO-d}_6$ ) spectra of  $\text{L}^4\text{H}_2 \cdot (\text{PF}_6)_2$ .

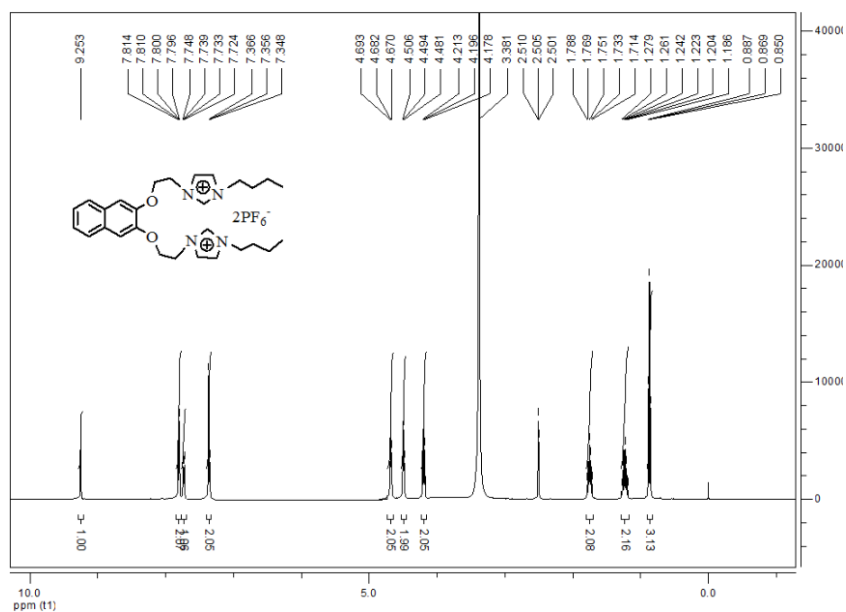

**Fig. S28** The  $^1\text{H}$  NMR (400 MHz,  $\text{DMSO-d}_6$ ) spectra of  $\text{L}^5\text{H}_2 \cdot (\text{PF}_6)_2$ .

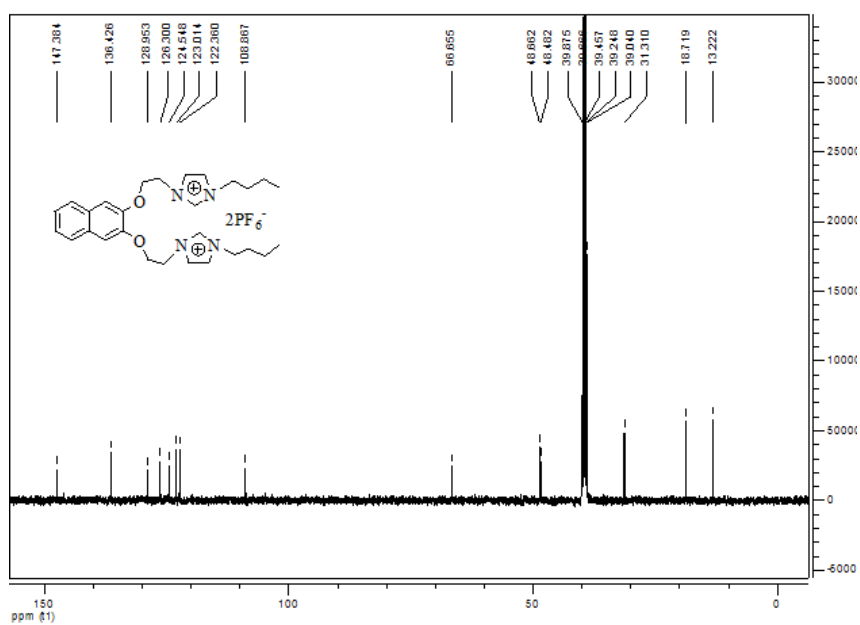

**Fig. S29** The  $^{13}\text{C}$  NMR (100 MHz,  $\text{DMSO-d}_6$ ) spectra of  $\text{L}^5\text{H}_2 \cdot (\text{PF}_6)_2$ .



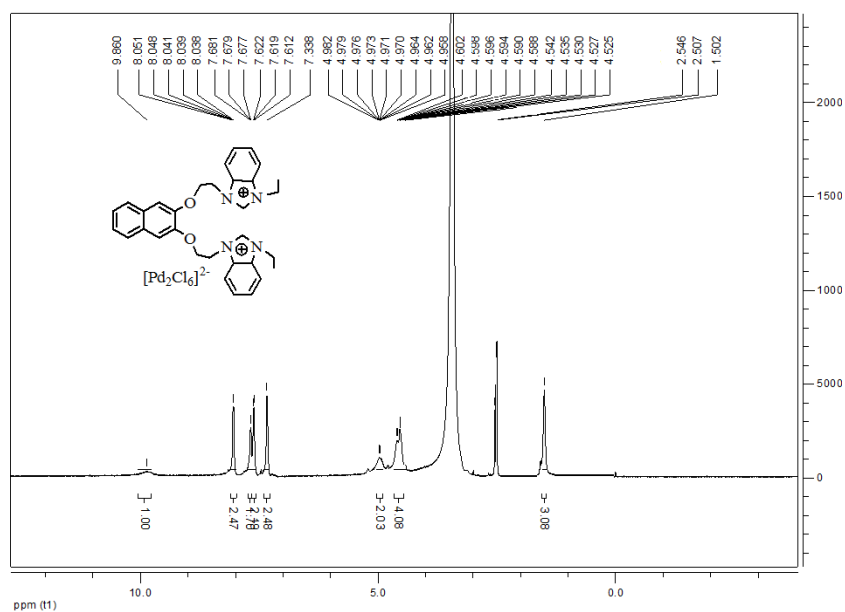

Fig. S32 The  $^1H$  NMR (400 MHz, DMSO- $d_6$ ) spectra of **1**.

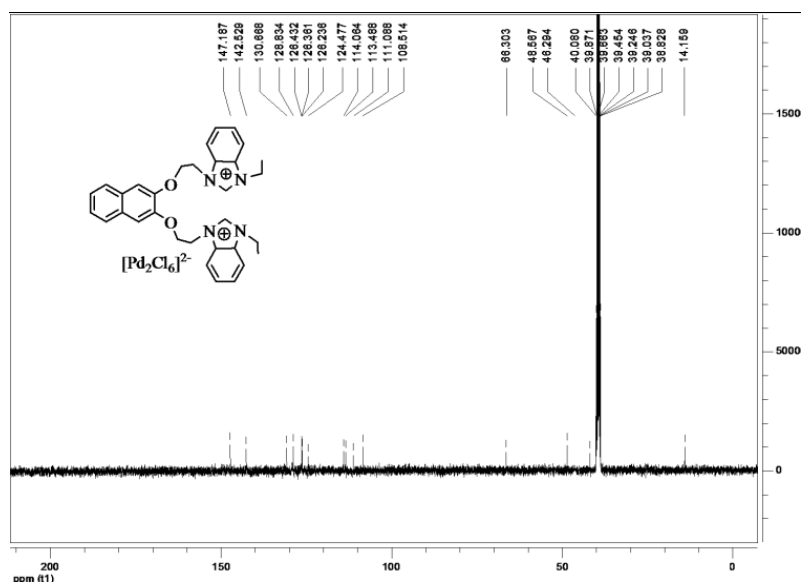

Fig. S33 The  $^{13}C$  NMR (100 MHz, DMSO- $d_6$ ) spectra of **1**.





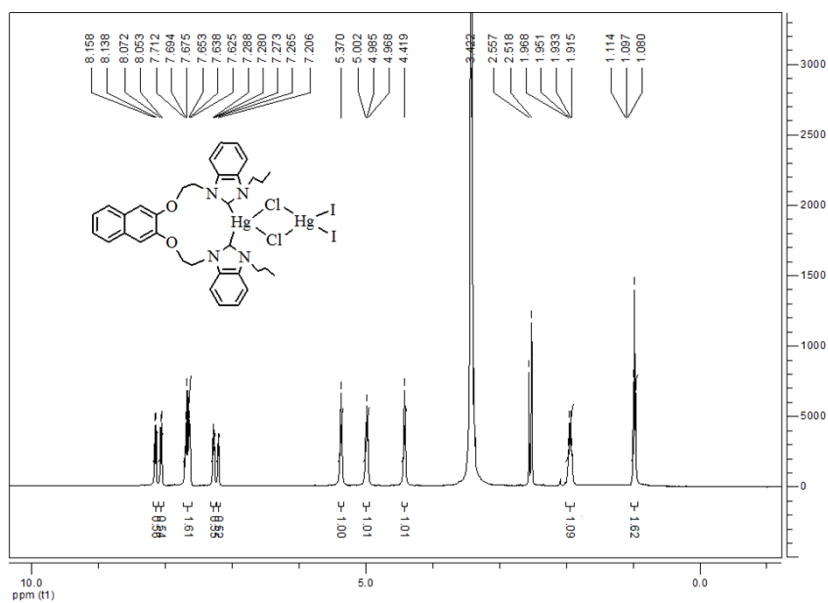

**Fig. S36** The  $^1\text{H}$  NMR (400 MHz,  $\text{DMSO-d}_6$ ) spectra of **3**.

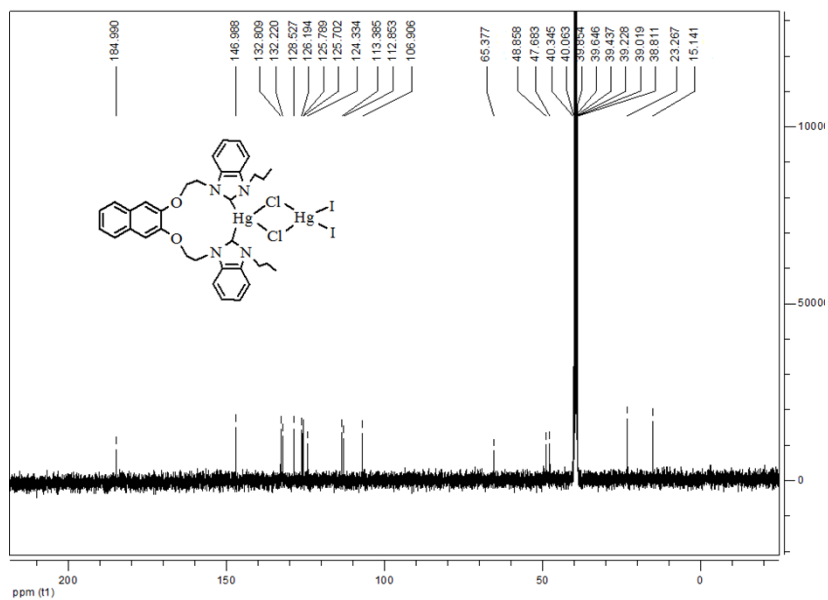

**Fig. S37** The  $^{13}\text{C}$  NMR (100 MHz,  $\text{DMSO-d}_6$ ) spectra of **3**.

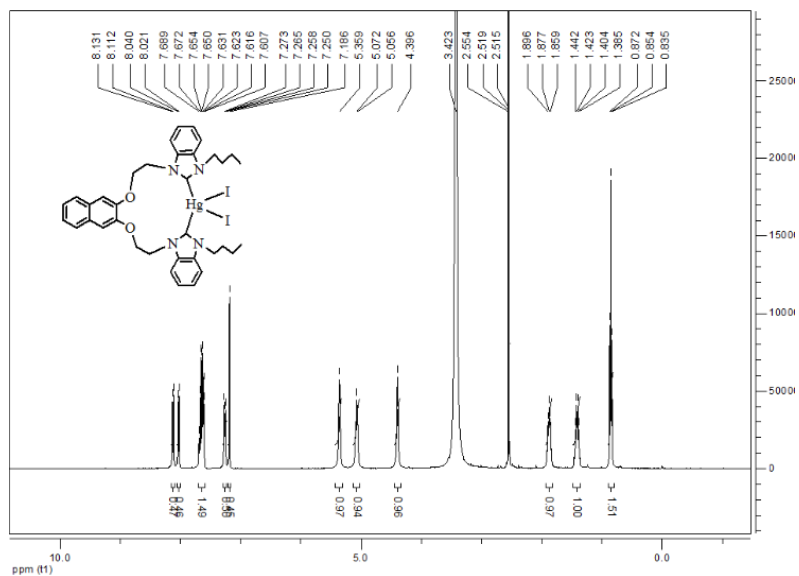

**Fig. S38** The  $^1\text{H}$  NMR (400 MHz,  $\text{DMSO-d}_6$ ) spectra of **4**.

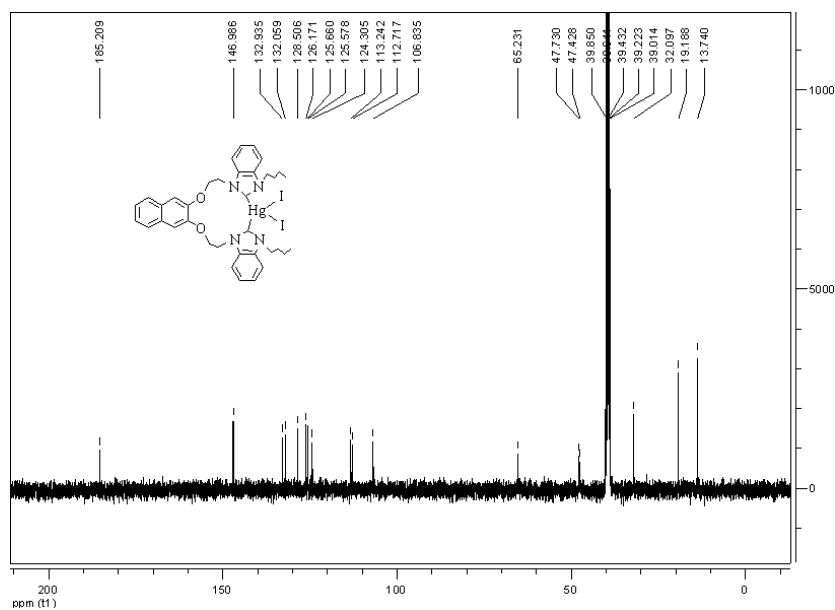

**Fig. S39** The  $^{13}\text{C}$  NMR (100 MHz,  $\text{DMSO-d}_6$ ) spectra of **4**.

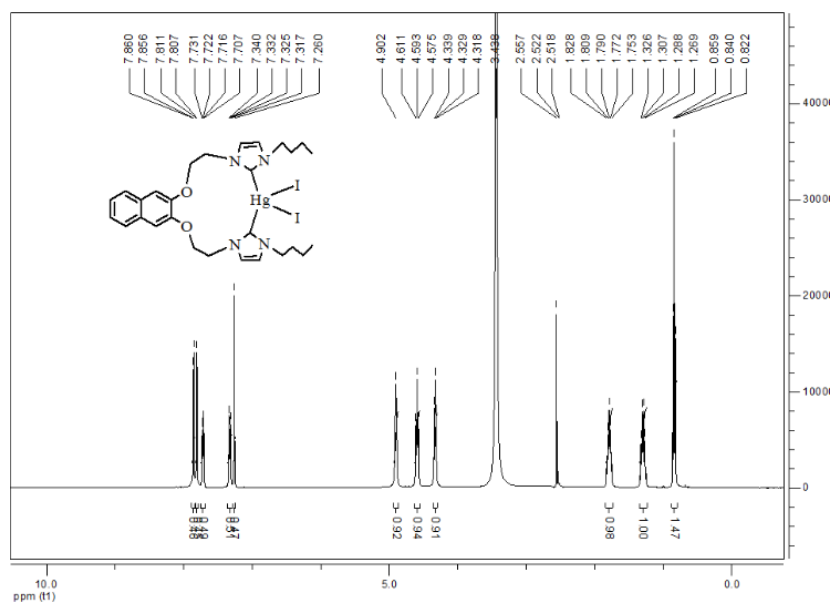

**Fig. S40** The  $^1\text{H}$  NMR (400 MHz,  $\text{DMSO-d}_6$ ) spectra of **5**.

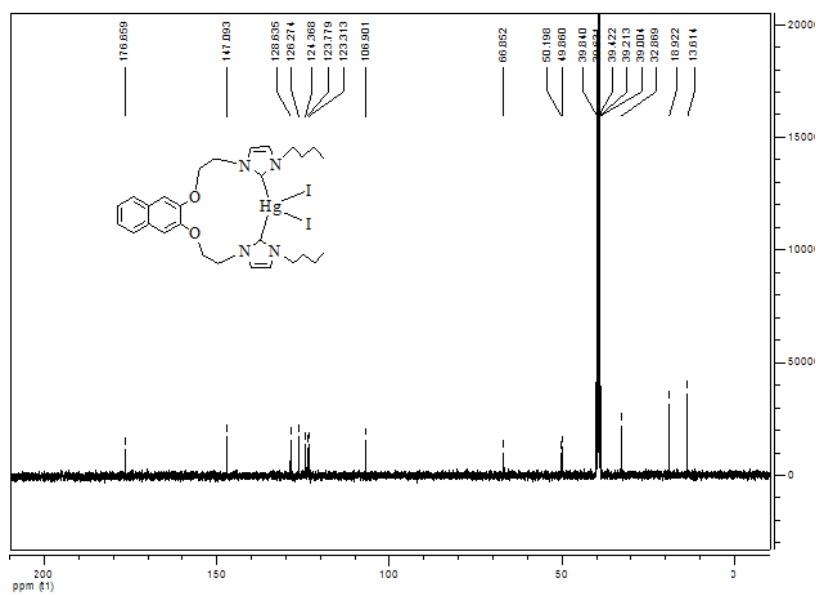

**Fig. S41** The  $^{13}\text{C}$  NMR (100 MHz,  $\text{DMSO-d}_6$ ) spectra of **5**.

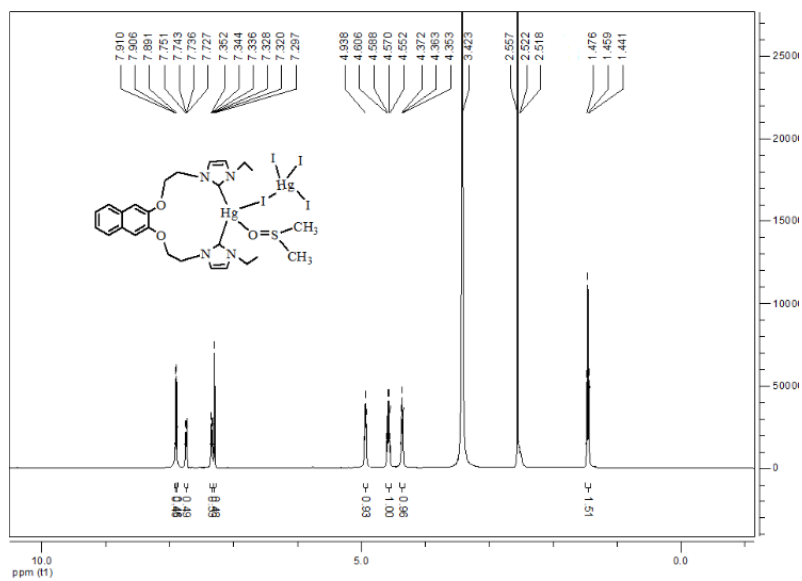

**Fig. S42** The  $^1\text{H}$  NMR (400 MHz, DMSO- $d_6$ ) spectra of **6**.

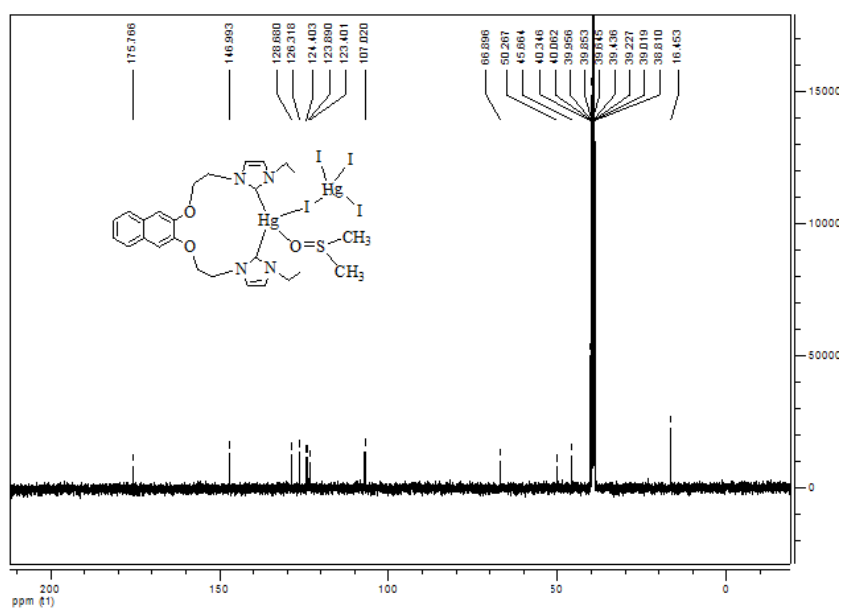

**Fig. S43** The  $^{13}\text{C}$  NMR (100 MHz, DMSO- $d_6$ ) spectra of **6**.

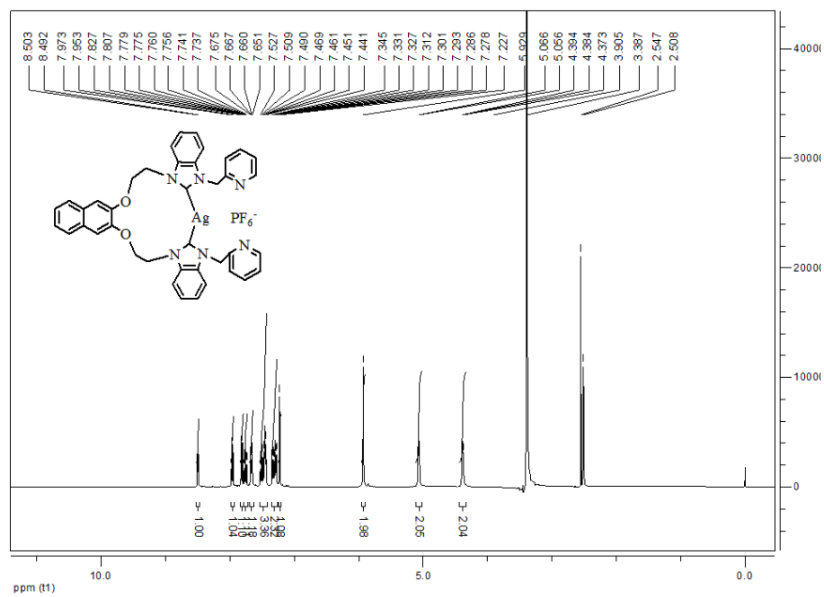

**Fig. S44** The  $^1\text{H}$  NMR (400 MHz,  $\text{DMSO-d}_6$ ) spectra of **7**.

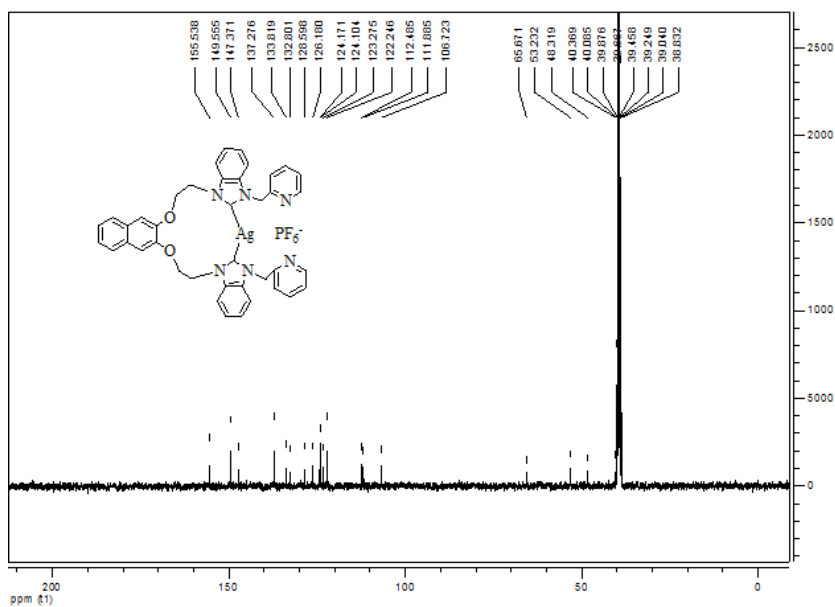

**Fig. S45** The  $^{13}\text{C}$  NMR (100 MHz,  $\text{DMSO-d}_6$ ) spectra of **7**.

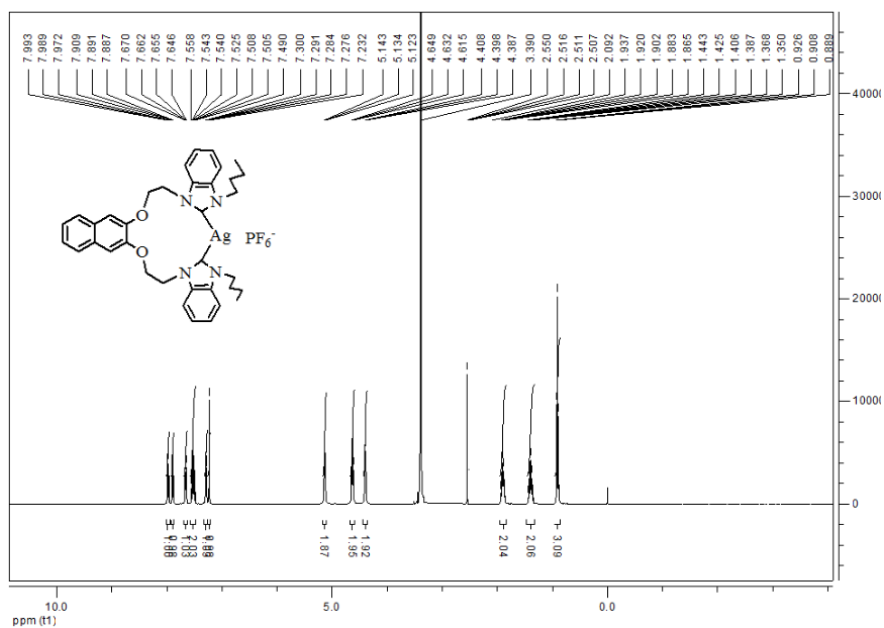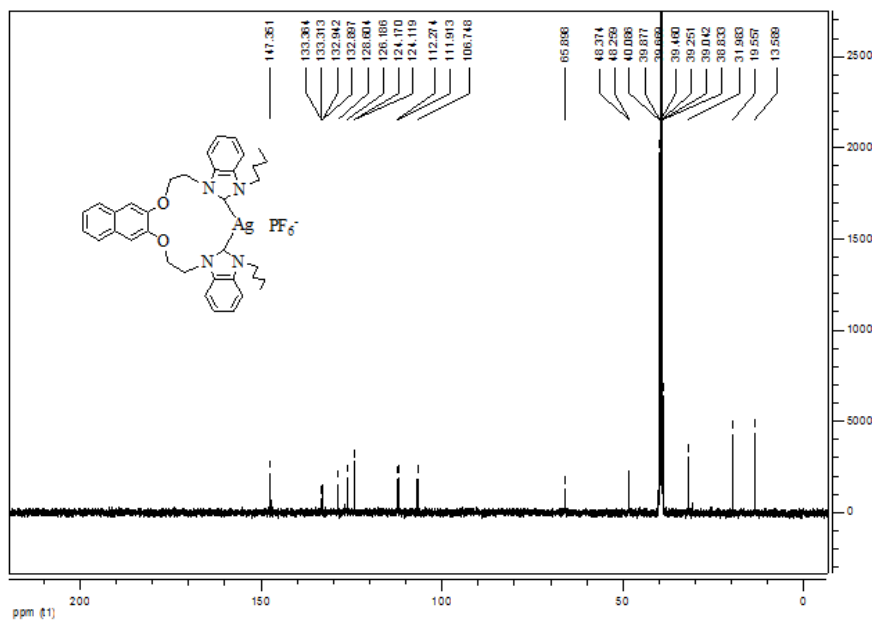

Supplement: c4ra14340j1.pdf [file c4ra14340j1.pdf]
